# Supplementary material for: A peptidomimetic modulator of the CaV2.2 N-type calcium channel for chronic pain
Source: PubMed Central journal article supplement — Proc Natl Acad Sci U S A. 2023 Nov 16;120(47):e2305215120. doi: 10.1073/pnas.2305215120 (PMC10666126; doi:10.1073/pnas.2305215120), 2023-11-16
Supplement: pnas.2305215120.sapp.pdf [file pnas.2305215120.sapp.pdf]

## Supporting Information for

### A peptidomimetic modulator of the Cav2.2 N-type calcium channel for chronic pain

Kimberly Gomez<sup>1,2†</sup>, Ulises Santiago<sup>3†</sup>, Tyler S. Nelson<sup>1,2</sup>, Heather N. Allen<sup>1,2</sup>, Aida Calderon-Rivera<sup>1,2</sup>, Sara Hestehave<sup>1,2</sup>, Erick J. Rodríguez Palma<sup>1,2</sup>, Yuan Zhou<sup>4</sup>, Paz Duran<sup>1,2</sup>, Santiago Loya-Lopez<sup>1,2</sup>, Elaine Zhu<sup>5,6</sup>, Upasana Kumar<sup>7</sup>, Rory Shields<sup>8</sup>, Eda Koseli<sup>9</sup>, Bryan McKiver<sup>9</sup>, Denise Giuvelis<sup>10</sup>, Wanhong Zuo<sup>11</sup>, Kufreobong E. Inyang<sup>12</sup>, Angie Dorame<sup>4</sup>, Aude Chefdeville<sup>4</sup>, Dongzhi Ran<sup>13</sup>, Samantha Perez-Miller<sup>1,2</sup>, Yi Lu<sup>13</sup>, Xia Liu<sup>13</sup>, Handoko<sup>14</sup>, Paramjit S. Arora<sup>14</sup>, Marcel Patek<sup>15</sup>, Aubin Moutal<sup>16</sup>, May Khanna<sup>1,2</sup>, Huijuan Hu<sup>11</sup>, Geoffroy Laumet<sup>12</sup>, Tamara King<sup>10</sup>, Jing Wang<sup>5,6,17</sup>, M. Imad Damaj<sup>9</sup>, Olga A. Korczeniewska<sup>7,8</sup>, Carlos J. Camacho<sup>3,\*</sup>, and Rajesh Khanna<sup>1,2,17,18,\*</sup>

<sup>1</sup>Department of Molecular Pathobiology, College of Dentistry, New York University, 433 First Avenue, 8th floor, New York, NY, 10010, USA

<sup>2</sup>NYU Pain Research Center, 433 First Avenue, New York, NY 10010, USA

<sup>3</sup>Department of Computational and Systems Biology, University of Pittsburgh, Pittsburgh, PA, 15261, USA

<sup>4</sup>Department of Pharmacology, College of Medicine, University of Arizona, Tucson, AZ 85724, USA

<sup>5</sup>Department of Anesthesiology, Perioperative Care and Pain Medicine, New York University Grossman School of Medicine, New York, NY, 10016, USA

<sup>6</sup>Interdisciplinary Pain Research Program, New York University Langone Health, New York, NY 10016 USA

<sup>7</sup>Center for Orofacial Pain and Temporomandibular Disorders, Department of Diagnostic Sciences, Rutgers School of Dental Medicine, Newark, NJ 07101, USA

<sup>8</sup>Rutgers School of Graduate Studies, Newark Health Science Campus, Newark, NJ 07101, USA

<sup>9</sup>Department of Pharmacology and Toxicology and Translational Research Initiative for Pain and Neuropathy, Virginia Commonwealth University, USA.

<sup>10</sup>Department of Biomedical Sciences, College of Osteopathic Medicine, Center for Excellence in the Neurosciences, University of New England, Biddeford, Maine 04005

<sup>11</sup>Department of Anesthesiology, Rutgers New Jersey Medical School, 185 S. Orange Ave., MSB, E-661, Newark, NJ 07103, USA

<sup>12</sup>Department of Physiology, Michigan State University, East Lansing, MI, 48824, USA

<sup>13</sup>Department of Pharmacology, School of Pharmacy, Chongqing Medical University, Chongqing 400016, China

<sup>14</sup>Department of Chemistry, New York University, 100 Washington Square East, New York, NY 10003, USA

<sup>15</sup>Bright Rock Path LLC, Tucson, Arizona, USA

<sup>16</sup>Department of Pharmacology and Physiology, School of Medicine, St. Louis University, St. Louis, MO, 63104, USA.

<sup>17</sup>Department of Neuroscience and Physiology and Neuroscience Institute, School of Medicine, New York University, New York, NY, 10010, USA.

<sup>18</sup>Chemical, and Biomolecular Engineering Department, Tandon School of Engineering, New York University, 6 Metrotech Center, Brooklyn, NY 11201

†Contributed equally to this work

\*Correspondence to:

Dr. Rajesh Khanna, Department of Molecular Pathobiology, College of Dentistry, New York University, 433 First Avenue, 8th floor, New York, NY, 10010, USA. Office phone: (520) 271-0433; Email: [rk4272@nyu.edu](mailto:rk4272@nyu.edu) or

53  
54 Dr. Carlos J. Camacho, Department of Computational and Systems Biology, University of Pittsburgh,  
55 Pittsburgh, PA, 15261, USA. Email: [ccamacho@pitt.edu](mailto:ccamacho@pitt.edu)

56  
57 **This PDF file includes:**

58  
59 SI Materials and Methods:  
60 Figures S1 to S14  
61 Tables S1 to S2  
62 SI References

63  
64 **Supporting Information**

## 65 **SI Materials and Methods**

66 **Study Design.** Detailed descriptions of experiments and associated references are available in SI  
67 Materials and Methods. This study was designed with the aim of developing selective blockers of Ca<sub>v</sub>2.2  
68 channels for use against chronic pain. Capitalizing on the demonstrated regulation of Ca<sub>v</sub>2.2 by the  
69 auxiliary protein CRMP2, we focused our efforts on designing a small molecule to emulate the  
70 antinociceptive CRMP2-derived peptide we previously reported to uncouple the Ca<sub>v</sub>2.2-CRMP2  
71 interaction. To identify a peptidomimetic of this peptide, we developed and applied a novel molecular  
72 dynamics approach to identify the Ca<sub>v</sub>2.2 recognition motif of the core peptide, used its presenting motif  
73 to design pharmacophore models to screen 27 million compounds in the open access server  
74 ZincPharmer. We used biochemical approaches to validate the interaction in cultured cells and  
75 investigated the effects of disrupting this interaction on Ca<sub>v</sub>2.2 trafficking. We used electrophysiological  
76 approaches to test the functional consequences of disrupting this interaction in DRG neurons and spinal  
77 cord slices. Furthermore, we investigated the effects of our disruption strategy in naïve animals as well as  
78 in three neuropathic pain and an inflammatory model to assay the off-target and on-target actions of this  
79 approach. Four routes of administration were used, including intraperitoneal, intrathecal, intraplantar, and  
80 intranasal. All electrophysiology, biochemistry, in vivo fiber photometry, and behavior experiments  
81 were performed according to established protocols (1). All animal protocols were approved by the  
82 Institutional Animal Care and Use Committee of the College of Medicine at the University of Arizona,  
83 College of Osteopathic Medicine, New York University Grossman School of Medicine, Virginia  
84 Commonwealth University, Rutgers New Jersey Medical School, Michigan State University, and Rutgers  
85 School of Dental Medicine, and conducted in accordance with the Guide for Care and Use of Laboratory  
86 Animals published by the National Institutes of Health. Sample sizes were determined based on our  
87 experience with electrophysiological, biochemical, and behavioral experiments in our laboratory.  
88 Experimenters were blind to the treatment and the animals were randomly assigned to experimental  
89 groups.

90

## 91 **Rational design of pharmacophore models in the absence of receptor structure.**

92 **Molecular dynamics of CBD3 peptide.** We modeled the CBD3 peptide based on the X-ray diffraction  
93 structure of CRMP2 (PDB: 5MKV) (2). Three independent molecular dynamics simulations (MDS) of both  
94 the CBD3 by itself and conjugated with a blood-brain barrier-permeable peptide TAT-CBD3 were run with  
95 pmemd.cuda (3-5) from AMBER18 using AMBER ff14SB force field (6). We used tLeap binary  
96 (AMBER18) for solvating the peptides in an octahedral TIP3P water box with a 15 Å distance from  
97 structure surface to the box edges, and closeness parameter of 0.75 Å. The neutralized system was  
98 solvated in a solution of 150 mM NaCl. H-bonds were constrained using SHAKE algorithm and integration  
99 time-step at 2 fs. Simulations were carried out equilibrating the system for 1 ns at NPT using Berstein  
100 barostat to keep constant pressure at 1 atm at 300K, followed by 300 ns NPT production at 300 K. The  
101 first 60 ns of each MDS were discarded as equilibration time.

102  
103 **Anchor prediction.** Hierarchical clustering (7) determined the most stable conformation of dipeptides  
104 between A<sub>1</sub> and L<sub>5</sub>. Clustering is based on the Root Mean Square Deviation (RMSD) between MDS

105 snapshots less than 1 Å for A<sub>1</sub>R<sub>2</sub>, R<sub>2</sub>S<sub>3</sub>, S<sub>3</sub>R<sub>4</sub>, and R<sub>4</sub>L<sub>5</sub>. We also determined the contacts of side chains  
106 as a proxy for ability to bind the receptor, i.e., if side chains are interacting with each other, their  
107 interaction with the receptor is hindered. Atomic contacts are defined as atoms from the peptide that are  
108 less than 3.8 Å of Cβ-alanine, [Nε, NH<sub>2</sub>]-arginine, Cβ-serine, [Cδ<sub>1</sub>, Cδ<sub>2</sub>]-leucine from dipeptides. The  
109 prediction is that the stable motif accessible to solvent is critical for molecular recognition, i.e., the anchor  
110 of the protein-protein interaction (8).

111  
112 **Virtual screening of ZINC database.** We used the anchor motif as template to design and refine  
113 pharmacophore models to virtually screen more than 27 million compounds using the public server  
114 ZINCPharmer (9). Based on A<sub>1</sub>R<sub>2</sub> configuration we screened near to 27 million commercially available  
115 compounds using ZINCPharmer, resulting in the compounds studied here. Small molecule conformations  
116 are sampled using Omega2 (10).

### 117 118 **Synthesis of CBD3063**

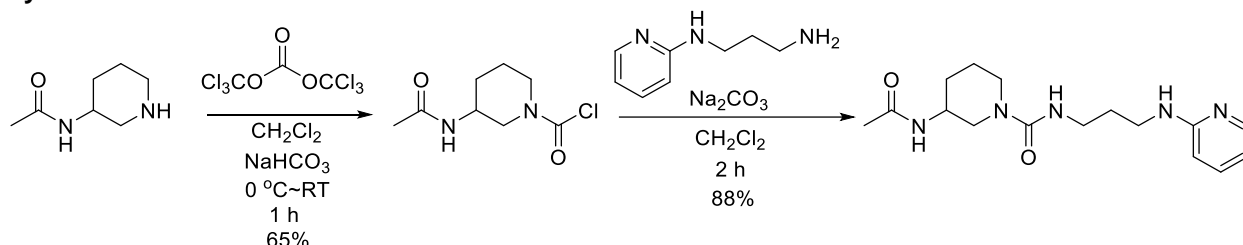

#### 119 120 **Step 1. 3-acetamidopiperidine-1-carbonyl chloride**

121 In a cooled ( $0\text{ }^\circ\text{C}$ ) solution of *N*-(piperidin-3-yl)acetamide (500 mg, 3.52 mmol) in anhydrous  
122 dichloromethane (20 mL) was added  $\text{NaHCO}_3$  (1.10 g, 10.6 mmol) and triphosgene (696 mg, 2.34 mmol).  
123 The mixture was stirred at room temperature for 1 hour. After all starting material has been consumed,  
124 the mixture was filtered, and the collected filtrate was evaporated under reduced pressure. The resulting  
125 residue was then allowed to pass through a short silica plug (wash with 100% EtOAc) to yield crude 3-  
126 acetamidopiperidine-1-carbonyl chloride (467 mg, 65%) as sticky transparent liquid (HRMS calcd for  
127  $\text{C}_8\text{H}_{14}\text{ClN}_2\text{O}_2^+$  [ $\text{M}+\text{H}$ ] $^+$ : 205.0748; found: 205.0738). The compound was used immediately for the next  
128 step without further purification.

#### 129 130 **Step 2. 3-acetamido-*N*-(3-(pyridin-2-ylamino)propyl)piperidine-1-carboxamide**

131 3-acetamidopiperidine-1-carbonyl chloride (100 mg, 0.489 mmol) from the previous step was dissolved in  
132 anhydrous dichloromethane (5.0 mL). Into this solution was added  $\text{Na}_2\text{CO}_3$  (104 mg, 0.977 mmol) and *N*-  
133 (pyridin-2-yl)propane-1,3-diamine (73.9 mg, 0.489 mmol). The mixture was stirred for 2 hours, upon which  
134 all starting material had reacted. The mixture was filtered, and the collected filtrate was evaporated under  
135 reduced pressure. The resulting residue was then purified by flash column chromatography (gradient  
136 elution of 0% to 10% MeOH in  $\text{CH}_2\text{Cl}_2$ ) to yield 3-acetamido-*N*-(3-(pyridin-2-ylamino)propyl)piperidine-1-  
137 carboxamide (137 mg, 88%) as white foam solid.  $^1\text{H}$  NMR (600 MHz,  $\text{CDCl}_3$ )  $\delta$  7.99 (dd,  $J = 4.1, 0.8$  Hz,  
138 1H), 7.38 (ddd,  $J = 8.7, 7.1, 1.9$  Hz, 1H), 6.53 (ddd,  $J = 7.0, 5.2, 0.8$  Hz, 1H), 6.41 (d,  $J = 8.4$  Hz, 1H),  
139 6.12 (d,  $J = 6.5$  Hz, 1H), 5.79 (t,  $J = 5.5$  Hz, 1H), 5.10 – 4.95 (m, 1H), 3.99 – 3.86 (m, 1H), 3.45 – 3.36 (m,  
140 6H), 3.32 (q,  $J = 6.1$  Hz, 2H), 1.95 (s, 3H), 1.87 – 1.62 (m, 5H), 1.61 – 1.49 (m, 1H).  $^{13}\text{C}$  NMR (151 MHz,  
141  $\text{CDCl}_3$ )  $\delta$  170.10, 158.60, 158.46, 147.02, 137.59, 112.50, 108.28, 48.66, 45.61, 44.60, 38.63, 37.69,  
142 30.22, 29.40, 23.37, 22.23. HRMS calcd for  $\text{C}_{16}\text{H}_{25}\text{N}_5\text{O}_2\text{Na}$  [ $\text{M}+\text{Na}$ ] $^+$ : 342.1900; found: 342.1908 (see  
143 NMR spectra below).

144

220408 AcNHPip-(CH<sub>2</sub>)<sub>3</sub>-NHPyr 1H 500Mhz CDCl<sub>3</sub>

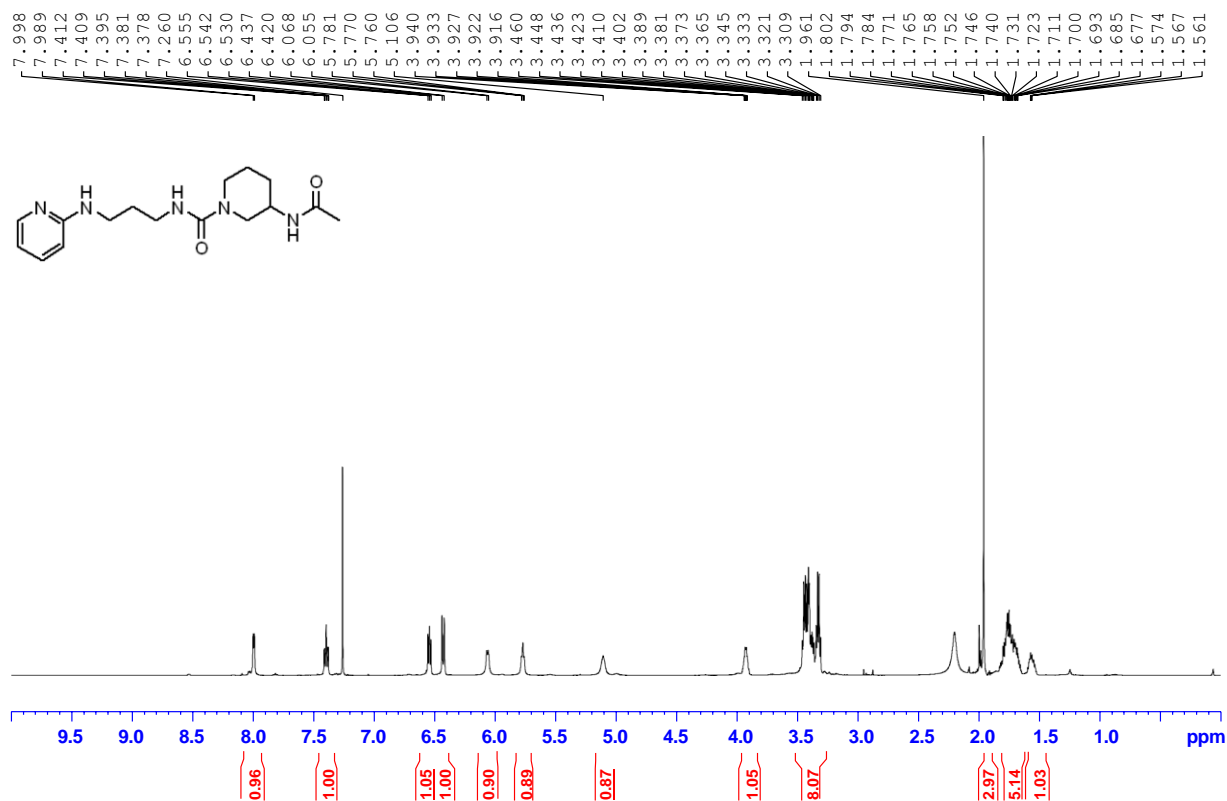

145  
146  
147  
148  
149  
150  
151  
152  
153  
154  
155  
156  
157  
158  
159  
160  
161  
162  
163  
164  
165  
166  
167  
168  
169  
170  
171  
172  
173

**Culturing of CAD cell lines.** Mouse neuron derived Catecholamine A differentiated (CAD) cells (ECACC Cat# 08100805, RRID: CVCL\_0199) were grown in standard cell culture conditions, 37 °C in 5% (vol/vol) CO<sub>2</sub>. The cells were maintained in DMEM/F12 media supplemented with 10% (vol/vol) FBS (HyClone) and 1% penicillin/streptomycin sulfate from 10,000 µg/mL stock.

**Immunoprecipitation (IP) of endogenous CRMP2 and SUMOylation.** CAD cells were incubated overnight with vehicle (0.1 % DMSO) or CBD3063 (20 µM). The next day the cells were lysed into the IP buffer containing 20 mM Tris-HCl pH=7.4, 50 mM NaCl, 2 mM MgCl<sub>2</sub>, 10 mM N-Ethylmaleimide (NEM), 1% (vol/vol) NP-40, 0.5% (mass/vol) sodium deoxycholate, 0.1% (mass/vol) sodium dodecyl sulfate (SDS) with protease inhibitors (Cat# B14002, Selleck, Houston, TX), phosphatase inhibitors (Cat# B15002, Selleck, Houston, TX) and Nuclease (Cat# 88701, Thermo Fisher Scientific, Waltham, MA). Total protein concentration was determined by BCA protein assay kit (Cat# PI23225, Thermo Fisher Scientific, Waltham, MA). Five hundred micrograms of total protein were incubated overnight with 2 µg of CRMP2 antibody (Cat# C2993, Sigma-Aldrich, St. Louis, MO) at 4°C under gentle agitation. For IP of SUMOylated CRMP2, CAD cells were transfected by using Lipofectamine 2000 (Cat# 11668019; Thermo Fisher Scientific, Waltham, MA) according to the manufacturer's instructions with 2.5 µg/µL pdsRed2-CRMP2 plasmid as previously described (11). 48 h after transfection, CAD cells were lysed into the IP buffer and 0.5% SDS was added to the lysates at 0.5% (mass/vol) final concentration, before boiling them for 5 min at 95 °C. Next, five hundred micrograms of total proteins were incubated with 5 µg of SUMO1 antibody (Cat# S8070; Sigma-Aldrich, St. Louis, MO) overnight at 4 °C under gentle agitation. Protein G magnetic beads (Cat# 10004D, Thermo Fisher Scientific, Waltham, MA), pre-equilibrated with the immunoprecipitation buffer, were then added to the lysates and incubated for 2 h at 4°C to capture immuno-complexes. Beads were washed four times with IP buffer to remove nonspecific binding of proteins, before resuspension in Laemmli buffer and boiling at 95°C for 5 min prior to immunoblotting.

**Immunoblot preparation and analysis.** Indicated samples were loaded on 4–20% Novex gels (Cat# XP04205BOX; Thermo Fisher Scientific, Waltham, MA). Proteins were transferred to preactivated

174 polyvinylidene difluoride (PVDF) membranes for 1 h at 100 V using TGS [25 mM Tris, pH 8.5, 192 mM  
175 glycine, 0.1% (mass/vol) SDS], 20% (vol/vol) methanol as transfer buffer (0.45  $\mu$ m; Cat# IPVH00010;  
176 Millipore Sigma, St. Louis, MO). After transfer, the membranes were blocked at room temperature for 1 h  
177 with TBST (50 mM Tris-HCl, pH 7.4, 150 mM NaCl, 0.1% Tween 20) with 5% (mass/vol) nonfat dry milk,  
178 and then incubated overnight at 4 °C separately with indicated primary antibodies (1:1,000 dilution),  $\beta$ III-  
179 Tubulin (Cat# G7121, Research Resource Identifiers (RRID):AB\_430874; Promega, Madison, WI),  
180 CRMP2 (Cat# C2993, RRID:AB\_1078573; Sigma-Aldrich, St. Louis, MO), Cav2.2 (Cat# TA308673,  
181 RRID:AB\_2650547; Origene, Rockville, MD), CRMP2 pSer522 (Cat# CP2191, RRID:AB\_2094486; ECM  
182 Biosciences, Versailles, KY), CRMP2 pT555 (Cat# CP2251, RRID:AB\_2094483; ECM Biosciences,  
183 Versailles, KY), CRMP2 pThr514 (Cat# PA5-110113, RRID:AB\_2855524; Thermo Fisher Scientific,  
184 Waltham, MA), in TBST, 5% (mass/vol) BSA. Following incubation in HRP-conjugated secondary  
185 antibodies from Jackson Immuno Research (West Grove, PA) (1:10,000 dilution), Mouse Anti-Rabbit  
186 (Cat# 211-032-171, RRID:AB\_2339149) and Goat Anti-Mouse (Cat# 115-035-174, RRID:AB\_2338512),  
187 blots were revealed by enhanced luminescence (WBKLS0500; Millipore Sigma St. Louis, MO). For  
188 examining the effect of CBD3063 on CRMP2 phosphorylation state, CAD cells were treated overnight  
189 with vehicle (0.1 % DMSO) or CBD3063 (20  $\mu$ M) and the next day cells were lysed using RIPA buffer  
190 containing 20 mM Tris-HCl pH=7.4, 50 mM NaCl, 2 mM MgCl<sub>2</sub>, 1% (vol/vol) NP-40, 0.5% (mass/vol)  
191 sodium deoxycholate, 0.1% (mass/vol) sodium dodecyl sulfate (SDS) with protease inhibitors (Cat#  
192 B14002, Selleck, Houston, TX), phosphatase inhibitors (Cat# B15002, Selleck, Houston, TX) and  
193 Nuclease (Cat# 88701, Thermo Fisher Scientific, Waltham, MA). Approximately 40  $\mu$ g of total proteins  
194 were loaded on an SDS-PAGE.  
195

#### 196 **Animals.**

197 Rats: Pathogen-free rats were kept in light (12-h light: 12-h dark cycle; lights on at 07:00 h) and  
198 temperature (23  $\pm$  3°C) controlled rooms. Adult female Sprague-Dawley rats (~200 g, Charles River  
199 Laboratories, Wilmington, MA.) were used for immunocytochemistry, confocal microscopy and calcium  
200 imaging experiments. Female Sprague-Dawley rats (~75-100 g, Charles River Laboratories, Wilmington,  
201 MA.) were employed for DRG electrophysiological recordings. Male Sprague-Dawley rats (250 g, Envigo,  
202 Placentia, CA) were used for SNI. Adult male and female Sprague-Dawley rats (56 days old, Charles  
203 River Laboratories, Raleigh, NC) were used for CION.  
204

205 Mice: C57BL/6 mice were kept in light (12-h light: 12-h dark cycle; lights on at 07:00 h) and temperature  
206 (23  $\pm$  3°C) controlled rooms. Male CD-1 mice (4 weeks) were used for sEPSC recordings in the spinal  
207 cord. Adult male and female C57BL/6J mice (8-12 weeks of age) were used for the CFA (original mice  
208 were from Jackson and then bred at MSU with ad libitum access to food and water, group housed 3-  
209 4/cage) and for evaluating side effects and dose-response in the SNI-model (8 weeks of age, The  
210 Jackson Laboratory, JAX - Bar Harbor, ME USA). Adult male and female C57BL/6J mice (8–10 weeks of  
211 age, The Jackson Laboratory, JAX - Bar Harbor, ME USA) were used for CIPN.  
212

213 Standard rodent chow and water were available *ad libitum*. All animal use was conducted in accordance  
214 with the National Institutes of Health guidelines, and the study was conducted in strict accordance with  
215 recommendations in the Guide for the Care and Use of Laboratory Animals of the College of Medicine at  
216 the University of Arizona, College of Osteopathic Medicine, New York University Grossman School of  
217 Medicine, Virginia Commonwealth University, Rutgers New Jersey Medical School, Michigan State  
218 University, and Rutgers School of Dental Medicine. All efforts were made to minimize animal suffering.  
219

#### 220 **Biochemistry.**

221 Dorsal root ganglion neuron cultures: Lumbar DRGs were dissected from 75-200 g female Sprague-  
222 Dawley rats using procedures as described previously (12). DRGs were excised and placed in sterile  
223 DMEM (Cat# 11965; Thermo Fisher Scientific, Waltham, MA). The ganglia were dissociated  
224 enzymatically with collagenase type I (5 mg/mL, Cat# LS004194; Worthington) and neutral protease  
225 (3.125 mg/mL, Cat# LS02104; Worthington, Lakewood, NJ) for 50 minutes at 37°C under gentle agitation.  
226 The dissociated cells were then centrifuged (800 rpm for 5 min) and resuspended in DMEM containing  
227 1% penicillin/streptomycin sulfate (Cat# 15140, Life Technologies, Carlsbad, CA), 10% fetal bovine serum  
228 [HyClone] and 30 ng/mL nerve growth factor (Cat# N2513, Millipore Sigma, St. Louis, MO). The cells  
229 were seeded on poly-D-lysine (0.1 mg/ml; Cat# P6407, Millipore Sigma, St. Louis, MO) and laminin (1

230 mg/ml; Cat#sc-29012, Santa Cruz Biotechnology, Dallas, TX) -coated 12- or 15-mm glass coverslips and  
231 incubated at 37°C. All cultures were used within 48 hours.

232  
233 Immunocytochemistry and confocal microscopy: Immunocytochemistry was performed on female rat DRG  
234 neurons incubated with vehicle (0.1 % DMSO) or CBD3063 (20 µM) overnight. Cultured DRG neurons  
235 were fixed using ice-cold methanol for 5 min and then allowed to dry at room temperature. Fixed cells  
236 were rehydrated in PSB and then blocked with PBS containing 3% bovine serum albumin for 30 min at  
237 room temperature. Cell staining was performed with anti-Cav2.2 (Origene, Cat# TA308673, Rockville,  
238 MD) in PBS with 3% BSA overnight at 4°C. The cells were then washed thrice in PBS and incubated with  
239 PBS containing 3% BSA and secondary antibodies (Alexa 488 Chicken anti-Rabbit (Life Technologies,  
240 Carlsbad, CA)) for 1 h at room temperature. Coverslips were mounted and stored at 4°C until analysis.  
241 Immunofluorescent micrographs were acquired on a Leica SP8 inverted upright microscope using a 63X,  
242 oil immersion objective. For all quantitative comparisons among cells under differing experimental  
243 conditions, camera gain and other relevant settings were kept constant. The freeware image analysis  
244 program Image J (<http://rsb.info.nih.gov/ij/>) was used for quantifying cellular fluorescence. Regions of  
245 interest (i.e., cells) were defined by hand using Image J.

246  
247 Calcium imaging: Changes in depolarization-induced calcium influx in rat DRG neurons were determined  
248 by loading neurons with 3 mM Fura-2AM for 30 minutes at 37°C (Cat# F1221; Thermo Fisher Scientific,  
249 Waltham, MA, stock solution prepared at 1 mM in DMSO, 0.02% pluronic acid, Cat# P-3000MP; Life  
250 Technologies, Carlsbad, CA) as previously described (13). DRG neurons were incubated overnight with  
251 20 µM of test compounds. A standard bath solution containing 139 mM NaCl, 3 mM KCl, 0.8 mM MgCl<sub>2</sub>,  
252 1.8 mM CaCl<sub>2</sub>, 10 mM Na-HEPES, 5 mM glucose, pH 7.4, was used. Depolarization was evoked with a  
253 10 sec pulse of 90 mM KCl. Fluorescence imaging was achieved with an inverted microscope, Nikon  
254 EclipseTi-U (Nikon Instruments Inc., Melville, NY), using objective Nikon Fluor 4X and a Photometrics  
255 cooled CCD camera CoolSNAPES2 (Roper Scientific, Tucson, AZ) controlled by NIS Elements software  
256 (version 4.20, Nikon Instruments). The excitation light was delivered by a Lambda-LS system (Sutter  
257 Instruments, Novato, CA). The excitation filters (340 ± 5 nm and 380 ± 7 nm) were controlled by a  
258 Lambda 10 to 2 optical filter change (Sutter Instruments, Novato, CA). Fluorescence was recorded  
259 through a 505-nm dichroic mirror at 535 ± 25 nm. Images were taken every ~2.4 seconds during the time  
260 course of the experiment to minimize photobleaching and phototoxicity. To provide acceptable image  
261 quality, a minimal exposure time that provided acceptable image quality was used. Changes in [Ca<sup>2+</sup>]<sub>c</sub>  
262 were monitored following a ratio of F<sub>340</sub>/F<sub>380</sub>, calculated after subtracting the background from both  
263 channels.

264  
265 In vivo calcium imaging (fiber photometry): Adult male and female wildtype mice received 500 nL of  
266 AAV9-CaMKIIa-GCamp6s-WPRE-SV40 (Addgene) in the right parabrachial nucleus (PBN) to transfect  
267 glutamatergic PBN neurons with the calcium indicator GCamp6s (coordinates: A/P-5.15 mm, M/L+/- 1.45  
268 mm, D/V-3.45 mm). Virus was precisely administered with a Nanoject II Auto-Nanoliter Injector  
269 (Drummond) at a rate of 2 nL/sec and a wait time of 5 minutes to prevent backflow. Directly following viral  
270 infusion, a fiber optic cannula with black ceramic ferrule (RWD, 1.25 mm ferrule diameter, 200 µm core  
271 diameter, and 0.37 numerical aperture) was chronically implanted in the right PBN and fixed to the skull  
272 using dental cement (Cat# 10-000-786, Stoelting). Mice were allowed 21 days to recover before  
273 undergoing baseline testing. Mice were acclimated in acrylic boxes on wire mesh with fiber optic patch  
274 cord attached for at least one hour prior to testing. Calcium transients were collected continuously  
275 (FP3002, Neurophotometrics) during mechanical stimulation protocol. A 0.07 g von Frey filament, 1.0 g  
276 von Frey filament, or blunted thumbtack was applied perpendicularly to the outer plantar surface of the  
277 left hindpaw for approximately one second. Each stimulus was repeated three times with two minutes  
278 between stimuli. Using custom MatLab scripts the GCamp6s signal (470 nm laser) was normalized to the  
279 isosbestic control 405 nm laser signal. Area under the curve was calculated for the fifteen seconds  
280 directly following stimulus application and normalized to the average of the area under the curve for  
281 fifteen seconds directly before stimulus. The day after baseline recordings, animals underwent spared  
282 nerve injury surgery (SNI, described below) to induce neuropathic pain. Twenty-one days following SNI,  
283 the fiber photometry protocol was repeated in the same animals to collect post SNI responses of  
284 glutamatergic neurons in the PBN to mechanical stimuli. Two days later, the same fiber photometry  
285 protocol was conducted again 1-2 hours after intraperitoneal injection of either CBD3063 (10 mg/kg) or

286 gabapentin (30 mg/kg). Two days later, the behavior and recording paradigm was repeated in a cross  
287 over design so that each animal received both CBD3063 and gabapentin in a randomized order.  
288 Following the completion of the experiment, animals were transcardially perfused with ice cold 1x PBS  
289 and 10% neutral buffered formalin (Cat# SF98-4, Fisher Scientific) before brains were extracted for  
290 verification of viral infection and fiberoptic placement. Thirty  $\mu\text{m}$  thick coronal brain sections were  
291 obtained on a cryostat and stored at 4°C.  
292

293 To visualize GCaMP6s expression we performed immunohistochemistry for GFP. Briefly, sections were  
294 washed 3 times in PBS for 5 minutes, incubated in normal goat serum (Cat# 5425, Cell Signaling  
295 Technology) based blocking buffer (PBS with 5% normal goat serum 0.1% Triton X-100) for one hour,  
296 and incubated in primary antibody (Rabbit anti-GFP 1:1000 in blocking buffer, Cat# AB3080, Millipore  
297 Sigma) overnight at room temperature on an orbital shaker. Sections were then washed 3 times in PBS  
298 with 0.1% Triton X-100 for 5 minutes, incubated for 1.5 hours in secondary antibody (goat anti rabbit  
299 AlexaFluor 488, Cat# A11008, Invitrogen), and washed again in PBS before being mounted on  
300 SuperFrost Plus microscope slides (Cat# 22-037-246, Fisher Scientific), coverslipped with Vectashield  
301 Plus antifade mounting medium with DAPI (H-2000-10, Vector Laboratories), and imaged at 20x on Leica  
302 DMI8 inverted widefield microscope. Three animals were excluded from the study due to fiberoptic  
303 headcap removal between baseline testing and post SNI testing. No animals were excluded due to post  
304 hoc target verification. Final n=8, 4 males and 4 females.  
305

306 Proximity ligation assay: The proximity ligation assay (PLA) was performed as described previously (14-  
307 16) to visualize protein-protein interactions by microscopy. This assay is based on paired complementary  
308 oligonucleotide-labelled secondary antibodies that can hybridize and amplify a red fluorescent signal only  
309 when bound to two corresponding primary antibodies whose targets are in close proximity (within 30 nm).  
310 Briefly, female rat DRG neurons were fixed using ice-cold methanol for 5 minutes and allowed to dry at  
311 room temperature. The proximity ligation assay was performed according to the manufacturer's protocol  
312 using the Duolink Detection Kit with PLA PLUS and MINUS probes for mouse and rabbit antibodies  
313 (Duolink in situ detection reagents red, cat. no. DUO92008; Duolink in situ PLA probe anti-rabbit MINUS,  
314 cat. no. DUO92005; Duolink in situ PLA probe anti-mouse PLUS, cat. no. DUO92001, Sigma-Aldrich).  
315 Primary antibodies (1/1000 dilution) were incubated for 1 hour at RT; CaV2.2 (Cat# ACC-002; Alomone,  
316 RRID:AB\_2039766) and CRMP2 (Cat#11096; Tecan, immunobiological lab, RRID:AB\_494511). Cells  
317 were then stained with 49,6-diamidino-2-phenylindole (DAPI, 50  $\mu\text{g}/\text{mL}$ ) to detect cell nuclei and mounted  
318 in ProLong Diamond Antifade Mountant (Cat# P36961, Life Technologies Corporation).  
319 Immunofluorescent micrographs were acquired using a Plan-Apochromat 63x/1.4 oil CS2 objective on a  
320 Leica SP8 confocal microscope operated by the LAS X microscope software (Leica). Camera gain and  
321 other relevant settings were kept constant throughout imaging sessions. Image J was used to count the  
322 number of PLA puncta per cell.  
323

324 Calcitonin gene-related peptide release: Adult female rats were anesthetized with 5% isoflurane and  
325 then decapitated. Two vertebral incisions (cervical and lumbar) were made to expose the spinal cord.  
326 Pressure was applied to a saline-filled syringe inserted into the lumbar vertebral foramen, and the spinal  
327 cord was extracted. Only the lumbar region of the spinal cord was used for the calcitonin gene-related  
328 peptide (CGRP) release assay. Baseline treatments involved bathing the spinal cord in standard Tyrode  
329 solution. The excitatory solution, consisting of 90 mM KCl, was paired with the treatment. These fractions  
330 (5 minutes, 700  $\mu\text{L}$  each) were collected for measurement of CGRP release. Samples were immediately  
331 stored in a  $-20^{\circ}\text{C}$  freezer. CBD3063 (20  $\mu\text{M}$ ), or vehicle (0.1% DMSO) was added to the pretreatment (30  
332 min) and cotreatment fractions. The concentration of CGRP released into the buffer was measured by  
333 enzyme-linked immunosorbent assay (Cat# 589001; Cayman Chemical, Ann Arbor, MI).  
334

### 335 **Electrophysiology.**

336 Whole-cell patch-clamp recordings of  $\text{Ca}^{2+}$ ,  $\text{Na}^{+}$ ,  $\text{K}^{+}$  and HCN currents in acutely dissociated DRG  
337 neurons: Recordings were obtained from acutely dissociated DRG neurons obtained from female rats as  
338 described earlier (13). Patch-clamp recordings were performed at room temperature (22–24°C). Currents  
339 were recorded using an EPC 10 Amplifier-HEKA (HEKA Elektronik, Ludwigshafen, Germany) linked to a  
340 computer with Patchmaster software. DRG neurons were incubated overnight (~16-24 h) with 20  $\mu\text{M}$  of  
341 CBD3063.



342  
343 For total calcium current ( $I_{Ca^{2+}}$ ) recordings, the external solution consisted of the following (in mM): 110 N-  
344 methyl-D-glucamine, 10 BaCl<sub>2</sub>, 30 TEA-Cl, 10 HEPES, 10 glucose, 0.001 TTX (pH 7.29 adjusted with  
345 TEA-OH, and mOsm/L= 310). Patch pipettes were filled with an internal solution containing (in mM): 150  
346 CsCl<sub>2</sub>, 10 HEPES, 5 Mg-ATP, and 5 BAPTA, (pH 7.24 adjusted with CsOH, and mOsm/L= 305). Peak  
347 Ca<sup>2+</sup> current was acquired by applying 200-millisecond voltage steps from -70 to +60 mV in 10-mV  
348 increments from a holding potential of -90 mV to obtain the current-voltage (I-V) relation. To measure the  
349 different subtypes of Ca<sup>2+</sup> channels, DRGs were treated with a Ca<sub>v</sub> inhibitor cocktail omitting the inhibitor  
350 specific to the subtype being tested (e.g., to measure Ca<sub>v</sub>2.2 currents, ω-conotoxin GVIA is omitted):  
351 Nifedipine (10 μM, L-type), ω-Conotoxin-GVIA (500 nM, P/Q-type) (17), SNX482 (200 nM, R-type) (18),  
352 ω-agatoxin (200 nM, P/Q-type) (19), TTA-P2 (1 μM, T-type) (20).  
353

354 For Na<sup>+</sup> current ( $I_{Na^+}$ ) recordings, the external solution contained (in mM): 130 NaCl, 3 KCl, 30  
355 tetraethylammonium chloride, 1 CaCl<sub>2</sub>, 0.5 CdCl<sub>2</sub>, 1 MgCl<sub>2</sub>, 10 D-glucose and 10 HEPES (pH 7.3 adjusted  
356 with NaOH, and mOsm/L= 324). Patch pipettes were filled with an internal solution containing (in mM):  
357 140 CsF, 1.1Cs-EGTA, 10 NaCl, and 15 HEPES (pH 7.3 adjusted with CsOH, and mOsm/L= 311). Peak  
358 Na<sup>+</sup> current was acquired by applying 150-millisecond voltage steps from -70 to +60 mV in 5-mV  
359 increments from a holding potential of -60 mV to obtain the current-voltage (I-V) relation.  
360

361 To isolate potassium currents ( $I_{K^+}$ ), DRG neurons were bathed in external solution composed of (in  
362 millimolar): 140 N-methyl-glucamine chloride, 5 KCl, 1 MgCl<sub>2</sub>, 2 CaCl<sub>2</sub>, 10 D-glucose and 10 HEPES (pH  
363 adjusted to 7.3 with KOH and mOsm/L= 313). Recording pipettes were filled with internal solution  
364 containing (in mM): 140 KCl, 2.5 MgCl<sub>2</sub>, 4 Mg-ATP, 0.3 Na-GTP, 2.5 CaCl<sub>2</sub>, 5 EGTA, and 10 HEPES (pH  
365 adjusted to 7.3 with KOH and mOsm/L= 320). From a holding potential of -60 mV, total  $I_K$  activation was  
366 determined by applying 300-millisecond voltage steps from -80 to +60 mV in 10-mV increments. To  
367 obtain  $I_{KA}$  a 4-s pre-pulse to -100 mV was applied followed by voltage steps of 500 milliseconds that  
368 ranged from -80 to +40 mV in +20-mV increments at 15-s intervals.  $I_{KS}$  was obtained from a conditioning  
369 4-sec pre-pulse to -40 mV followed by voltage steps of 500 milliseconds that ranged from -80 to +40 mV  
370 in +20-mV increments at 15-s intervals.  
371

372 To isolate HCN currents, the external solution consisted of the following (in mM): 40 NaCl, 4 KCl, 1.8  
373 CaCl<sub>2</sub>, 1 MgCl<sub>2</sub>, 10 D-glucose and 1 HEPES (pH adjusted to 7.4 with NaOH and mOsm/L= 298). Internal  
374 solution consisted of the following (in mM): 140 KCl, 2.5 Mg-ATP, 0.5 Na-GTP, 2 EGTA, 10 HEPES and  
375 0.0001 cAMP (pH adjusted to 7.4 with KOH and mOsm/L= 310). From a holding potential of -60 mV HCN  
376 activation was determined by applying 5000-millisecond voltage steps from -130 to -40 mV in 10-mV  
377 increments.  
378

379 Normalization of currents to each cell's capacitance (pF) was performed to allow for collection of current  
380 density data. For I-V curves, functions were fitted to data using a non-linear least squares analysis. I-V  
381 curves were fitted using double Boltzmann functions:

$$382 \quad f = a + g_1 / (1 + \exp((x - V_{1/21}) / k_1)) + g_2 / (1 + \exp(-(x - V_{1/22}) / k_2))$$

383 where  $x$  is the pre-pulse potential,  $V_{1/2}$  is the mid-point potential and  $k$  is the corresponding slope factor  
384 for single Boltzmann functions. Double Boltzmann fits were used to describe the shape of the curve, not  
385 to imply the existence of separate channel populations. Numbers 1 and 2 simply indicate first and second  
386 mid-points;  $a$  along with  $g$  are fitting parameters.

387 Activation curves were obtained from the I-V curves by dividing the peak current at each depolarizing step  
388 by the driving force according to the equation:  $G = I / (V_{mem} - E_{rev})$ , where  $I$  is the peak current,  $V_{mem}$  is the  
389 membrane potential and  $E_{rev}$  is the reversal potential. The conductance ( $G$ ) was normalized against the  
390 maximum conductance ( $G_{max}$ ). For total and the different subtypes of Ca<sup>2+</sup> currents, steady-state  
391 inactivation (SSI) curves were obtained by applying an H-infinity protocol that consisted of 1.5-seconds  
392 conditioning pre-pulses from -100 to +30 mV in 10-mV increments followed by a 20-millisecond test pulse  
393 to +10 mV. For Na<sup>+</sup> currents, SSI curves were obtained by applying an H-infinity protocol that consisted of



394 1-second conditioning pre-pulses from  $-120$  to  $+10$  mV in 10-mV increments followed by a 200-  
395 millisecond test pulse to  $+10$  mV. Inactivation curves were obtained by dividing the peak current recorded  
396 at the test pulse by the maximum current ( $I_{max}$ ). Activation and SSI curves were fitted with the Boltzmann  
397 equation.

398 Action potential recordings in acutely dissociated DRG neurons: For current-clamp recordings the  
399 external solution contained (in millimolar): 154 NaCl, 5.6 KCl, 2 CaCl<sub>2</sub>, 1 MgCl<sub>2</sub>, 10 D-Glucose, and 8  
400 HEPES (pH 7.4 adjusted with NaOH, and mOsm/L= 300). The internal solution was composed of (in  
401 millimolar): 137 KCl, 10 NaCl, 1 MgCl<sub>2</sub>, 1 EGTA, and 10 HEPES (pH 7.3 adjusted with KOH, and  
402 mOsm/L= 277). At room temperature (22–24°C), whole-cell patch clamp configuration was made, and  
403 current-clamp mode was performed to record action potentials. DRG neurons with a resting membrane  
404 potential (RMP) more hyperpolarized than  $-40$  mV, stable baseline recordings, and evoked spikes that  
405 overshoot 0 mV were used for experiments and analysis. The action potentials were evoked by current  
406 injection steps from 0–120 pA with an increment of 10 pA in 300 ms. Rheobase was measured by  
407 injecting currents from 0 pA with an increment of 10 pA in 50 ms. Analyses were performed by using  
408 Fitmaster software (HEKA) and Origin 9.0 software (OriginLab).

409 Whole-cell patch clamp recordings of spinal cord slices: Spinal cord slices were prepared from male CD-1  
410 mice (4 weeks) as we described previously (21). Briefly, the vertebral column was isolated and immersed  
411 in ice-cold oxygenated N-methyl-D-glucamine (NMDG)-based artificial CSF (ACSF) containing the  
412 following (in mM): 93 NMDG, 93 HCl, 30 NaHCO<sub>3</sub>, 20 HEPES, 2.5 KCl, 1.2 NaH<sub>2</sub>PO<sub>4</sub>, 10 MgCl<sub>2</sub>, 0.5  
413 CaCl<sub>2</sub>, 25 glucose (osmolality, 305–310 mmol/kg). The lumbar spinal cord was removed and glued onto  
414 the cutting platform with the adhesive Loctite 404 (Loctite). Transverse spinal cord slices (300  $\mu$ m) were  
415 cut in NMDG ACSF with a Compresstome VF-200 slicer (Precisionary Instruments Inc., Greenville, NC,  
416 USA), then immediately transferred to a holding chamber and incubated in the oxygenated normal ACSF  
417 containing (in mM): 26 NaHCO<sub>3</sub>, 120 NaCl, 5 KCl, 1.25 NaH<sub>2</sub>PO<sub>4</sub>, 1 MgCl<sub>2</sub>, 1 CaCl<sub>2</sub>, 12.5 glucose  
418 (osmolality, 305–310 mmol/kg) for 1 h at 32 °C, then maintained in oxygenated ACSF at room  
419 temperature (24–25 °C). A single slice was transferred to a submersion-type recording chamber and  
420 mechanically stabilized with a platinum ring.

421  
422 Spinal cord neurons in lamina I or II were visualized using an infrared differential contrast and  
423 fluorescence microscopy (Leica Microsystems). Excitatory postsynaptic currents (EPSC) were recorded  
424 with an Axon 700B amplifiers, a Digidata 1440A A/D converter, and Clampfit 10.4 software (Molecular  
425 Devices Co., Union City, CA, USA). Data were filtered at 2 kHz and sampled at 5 kHz. Throughout the  
426 experiments, slices were perfused continuously with warm (37 °C) oxygenated ACSF (2-3 mL/min). Patch  
427 pipettes (6–8 M $\Omega$ ) were filled with the internal solution (in mM) 140 cesium methanesulfonate, 5 KCl, 2  
428 MgCl<sub>2</sub>, 10 HEPES, 2 MgATP, 0.2 GTP for recordings under voltage-clamp. The excitatory postsynaptic  
429 currents (EPSCs) were recorded at a holding potential of  $-60$  mV in the presence of gabazine (10  $\mu$ M),  
430 SCH50911 (20  $\mu$ M), and strychnine (0.5  $\mu$ M), which block GABA<sub>A</sub>, GABA<sub>B</sub> and glycine receptors,  
431 respectively. These events were blocked by DNQX (20  $\mu$ M), an antagonist of  $\alpha$ -amino-3-hydroxy-5-  
432 methylisoxazole-4-propionic acid (AMPA) receptors, indicating that they were mediated by AMPA  
433 receptors.

434  
435 **Pain models.**

436  
437 Spared nerve injury (SNI) model of neuropathic pain:  
438 Mice and rats were anesthetized with isoflurane (5% induction, 2% maintenance in 2 L/min air), and skin  
439 on the lateral surface of the left hind thigh was incised. Then, the biceps femoris muscle was dissected to  
440 expose the three terminal branches of the sciatic nerve. The common peroneal and tibial branches were  
441 tightly ligated with 4-0 silk and axotomized 2.0 mm distal to the ligation. In rats, the closure of the incision  
442 was made in two layers. The muscle was sutured once with 5-0 absorbable suture; skin was autoclipped.  
443 Animals were allowed to recover for 10 days before any testing. On the 10<sup>th</sup> day after SNI, CBD3063 (0.3  
444  $\mu$ g/kg) or 1% DMSO was injected intrathecally. Mechanical allodynia was assessed 10 days after surgery.  
445 In mice, the skin was autoclipped. Twenty-one days after surgery, mice were injected i.p. with vehicle  
446 (10% DMSO in saline), CBD3063 (0.01, 0.10, 1.0 and 10  $\mu$ g/kg) or gabapentin (GBP; 30 mg/kg) and  
447 mechanical and cold allodynia were assessed.  
448

449 Chemotherapy induced peripheral neuropathy (CIPN) model of paclitaxel: Paclitaxel was purchased from  
450 VCU Health Pharmacy (Athenex, NDC 70860-200-50, Richmond, VA, USA) and dissolved in a 1:1:18  
451 mixture of 200 proof ethanol, kolliphor, and distilled water (Sigma-Aldrich) to a dose of 8 mg/kg. Paclitaxel  
452 was then administered intraperitoneally every other day for four doses to 8 males and 8 females. The  
453 remaining 16 animals received the vehicle 1:1:18 at a volume of 10 ml/kg, i.p. following the same injection  
454 regimen. After the final Paclitaxel and 1:1:18 injection, these two groups were separated further whereby  
455 4 males and 4 females from each group for compound-treatment (n = 8/group) (22).

456  
457 Mechanical and cold sensitivity baselines (BL) were measured before induction of the pain model. Mice  
458 were then injected with paclitaxel (8 mg/kg, i.p. every other day for a total of 4 doses) or vehicle as  
459 explained above and tested at day 21 after the first dose of paclitaxel (time 0). Mice were then injected  
460 i.p. with CBD3063 (9 mg/kg) or 10% DMSO (vehicle) and then tested for mechanical and cold sensitivity  
461 at the following time points: 1, 3, 6 and 24 hr.

462  
463 Chronic constriction injury of the rat's infraorbital nerve: Prior to surgical procedures, male rats were  
464 anesthetized with intraperitoneal injections of ketamine (50 mg/kg)/xylazine (7.5 mg/kg) solution. A single  
465 investigator performed the surgeries to minimize variability. Unilateral chronic constriction injury to the  
466 infraorbital nerve (CION) was used to induce trigeminal neuropathic pain in rats as previously described  
467 (23). Briefly, following anesthesia, an approximately 1 cm long incision was made along the left  
468 gingivobuccal sulcus beginning just proximal to the first molar. ION was exposed (~0.5 cm) and freed  
469 from the surrounding tissue. Two chromic gut (4-0) ligatures were loosely tied around the exposed nerve.  
470 The incision was closed with the absorbable sutures.

471  
472 Complete Freund's adjuvant (CFA)-induced peripheral inflammation: Peripheral inflammation was  
473 induced by administration of 5 µg Complete Freund's adjuvant (1 mg/ml, each ml of CFA contains 1 mg of  
474 heat-killed and dried Mycobacterium tuberculosis). Two days post-CFA injection, mechanical  
475 hypersensitivity was measured again followed by a single CBD3063 injection administered intraplantarly  
476 in the inflamed paw (25 µg in 5 µL) or saline as vehicle.

#### 477 **Compound administration.**

478  
479 Intraperitoneal: Naïve male and female mice were subjected to intraperitoneal administrations of  
480 CBD3063 (10 mg/kg), gabapentin (30 mg/kg), or vehicle (10% DMSO; 1 ml/kg). Intraperitoneal delivery  
481 was carried out using a 30-gauge, 0.3-inch needle, inserted into the lower left quadrant of the abdomen.  
482 The needle was positioned parallel to the backbone at a 45° angle to the abdominal wall. Behavioral  
483 assessments were conducted at 1-, 2-, 3-, 4-, 5-, and 6-hours following administration to measure paw  
484 withdrawal threshold and cold aversion time. Additionally, assessments for hotplate, tail flick, tail  
485 suspension, open field, and novel object recognition were performed 2 h post-administration.

486  
487 Intranasal: At 22 days post-CION, half of the rats received an intranasal CBD3063 (200 µg in 20µL  
488 isotonic saline) and the remaining half received 20µL of isotonic saline (vehicle-control). Intranasal  
489 delivery was performed with a pipette and a disposable plastic tip. Immediately after administration, the  
490 head of the animal was held in a tilted back position for ~15 seconds to prevent loss of solution from the  
491 nares. Behavioral assessments were done at 30 minutes, 1-, 2-, and 3-hours post-administration.

492  
493 Intraplantar: To establish the inflammatory pain model, naïve mice were subjected to an intraplantar  
494 injection of CFA (5 µg per paw. 1 mg/ml, each ml of CFA contains 1 mg of heat-killed and dried  
495 Mycobacterium tuberculosis). Intraplantar delivery was carried out using a 30-gauge, 0.3-inch needle,  
496 inserted subcutaneously into the center of the hind foot forming a small bleb at the injection site. Two  
497 days after CFA injection, male and female mice received an ipsilateral intraplantar administration of  
498 CBD3063 (25 µg/5 µl) or vehicle (saline) and the paw withdrawal threshold were measured at 1-, 2-, 3-,  
499 and 4-hours following administration.

500  
501 Indwelling intrathecal catheter: Rats were anesthetized with ketamine/xylazine 80/12 mg/kg  
502 intraperitoneally (i.p.) (Sigma-Aldrich, St. Louis, MO), and their head was placed in a stereotaxic frame.  
503 The cisterna magna was exposed and incised. As previously reported, an 8-cm catheter (PE-10;  
504 Stoelting, Wood Dale, IL) was implanted, terminating in the lumbar region of the spinal cord (24).

505 Catheters were sutured (using 3–0 silk sutures) into the deep muscle and externalized at the back of the  
506 neck. Autoclips were used to close the skin, and other surgeries were performed after a 5- to 7-day  
507 recovery period. A single intrathecal administration of CBD3063 (0.3 µg/kg), was performed seven days  
508 following SNI. To assess the long-term antinociceptive effects of CBD3063, rats were injected with  
509 CBD3063 (0.3 µg/kg) starting 7 days after SNI surgery and once a day for 14 days.

510  
511 **Behavioral testing.**

512 Mechanical sensitivity test:

513 *Rats with SNI.* Mechanical allodynia was assessed by measuring rats' paw withdrawal threshold in  
514 response to probing with a series of fine calibrated filaments (von Frey, Stoelting, Wood Dale, IL). Rats  
515 were placed in suspended plastic cages with wire mesh floor, and each von Frey filament was applied  
516 perpendicularly to the plantar surface of the paw. The "up-and-down" method (sequential increase and  
517 decrease of the stimulus strength) was used to determine the withdrawal threshold Dixon's nonparametric  
518 method was used for data analysis, as described by Chaplan et al (25). Data were expressed as the  
519 mean withdrawal threshold.

520  
521 *Rats with CION.* von Frey detection threshold was measured by applying von Frey monofilaments  
522 delivering calibrated amount of force ranging from 0.0008 g to 1 g or converted to log units 1.65 to 4.08  
523 (EXACTA Precision & Performance monofilaments, Stoelting) within the ION dermatome in ascending  
524 order of intensity (26). The lowest filament that evoked one withdrawal response was designated as the  
525 withdrawal threshold. A decrease in the withdrawal threshold is indicative of development of  
526 hypersensitivity.

527  
528 *Mice.* Animals were placed in acrylic cages on a mesh grid floor and allowed to acclimate for 60 minutes  
529 before the experiment. A Von Frey filament was applied perpendicularly to the plantar surface of the paw  
530 to determine the 50% paw withdrawal threshold using the up-down method as previously described (25).  
531 In sham animals, a value of 0.8-1 g was considered normal, while the presence of tactile allodynia was  
532 considered when the 50% withdrawal threshold of the limb was < 0.2 g.

533  
534 Cold sensitivity test: Mice were individually caged on mesh metal flooring for 30 minutes prior to testing.  
535 20 µL of acetone (Sigma-Aldrich, MO, USA) was applied onto the lateral side of the plantar surface of  
536 each hind paw via pipette or a syringe connected to PE-90 tubing. The cumulative time spent licking,  
537 slapping, flinching, or shaking the hind paw was recorded for 60 seconds.

538  
539 Tail-Flick test: For this test, mice were injected with CBD3063 (10 mg/kg; i.p.), gabapentin (30 mg/kg) or  
540 vehicle (1 ml/kg, DMSO 10%, i.p.) and 2 hours later the tail flick test was performed as previously  
541 reported (1). Mice were immobilized and the distal third of the tail was gently immersed in warm water at a  
542 temperature of 52°C. The duration until tail withdrawal from the water (tail withdrawal latency) was  
543 recorded, considering a 10-second cut-off to avoid tissue damage.

544  
545 Hot plate test: The hot plate test was performed as previously reported (1). Mice received a single  
546 intraperitoneal administration of CBD3063 (10 mg/kg), gabapentin (30 mg/kg) or vehicle (1 ml/kg, DMSO  
547 10%, i.p.) and 2 hours post-administration each mouse was placed on a heated metal plate (Hot/Cold  
548 Plate, Ugo Basile) maintained at 52 ± 2 °C, without prior habituation. The onset of the first nocifensive  
549 response was recorded, (i.e., hind paw flinching, paw licking, or jumping). A 30-second cut-off was  
550 established to prevent potential tissue damage.

551  
552 Open field test (OFT): OFT experiments were conducted in mice 2h after i.p. injection of CBD3063  
553 (10mg/kg), gabapentin (30mg/kg) and vehicle (10% DMSO in saline). Doses and timing were chosen  
554 based on the dose-response results showing similar analgesic effects of the two compounds at those  
555 doses. The OFT apparatus was a squared arena (30\*30cm), and each animal was recorded for 15  
556 minutes using an overhead camera (Microsoft LifeCam HD-3000) and tracking of the center-point was  
557 performed using ANY-maze software (version 7.2, Stoelting Co). The arena was divided into center  
558 (15\*15 cm) and peripheral (7.5 cm along the perimeter) zones. The duration of time spent in the  
559 peripheral versus center zones of the arena was used as a marker for anxiety-like behavior, while "time  
560 immobile" was used to assess sedative-like effects.

561  
562 Tail suspension test: The tail suspension test was carried out as previously described (27). In brief, mice  
563 received CBD3063 (10 mg/kg; i.p.), gabapentin (30 mg/kg; i.p.) or vehicle (1 ml/kg, DMSO 10%, i.p.) and  
564 2 hours post-administration the mice were gently handled, and a climb-stopper was attached to their tail.  
565 Then the animals were suspended by their tails using adhesive tape and monitored over a 6-minute  
566 period. The immobility time was determined by analyzing the mobility time (i.e., strong shaking of the  
567 body, movement of the limbs like running, climb-type movements), which was subtracted from the total  
568 time of test.

569  
570 Novel object recognition (NOR): The NOR test was performed similarly to previously described (28), with  
571 some modifications. Testing was carried out in the same squared arena as the OFT test, 3-5 days following  
572 the OFT, making the OFT-test also serve as habituation to the arena without objects. A camera was  
573 positioned directly above the arena and connected to a computer performing live-tracking and recording of  
574 the behavior using ANY-maze software, with tracking of nose and center points. The familiar/similar objects  
575 were brown circular glass bottles (d; 7 cm, h; 18 cm), while the “novel” object was a translucent elliptical  
576 glass bottle (d; 8\*4 cm, h; 15 cm) containing white powder for coloring. The animal was placed in the arena  
577 facing away from the objects, and first allowed 10minutes freely exploration and familiarization to the arena  
578 including the two similar brown glass bottles (making these “familiar object” following the habituation phase),  
579 placed in two opposite quadrants of the arena.

580  
581 Injections of CBD3063 (10mg/kg), gabapentin (30mg/kg) and vehicle (10% DMSO in saline) were  
582 performed i.p. 1 h after the familiarization, and 2 h before the test-session. For the test-session, the animal  
583 was reintroduced to the arena for a 5min test, where one of the familiar objects had been replaced with the  
584 novel object. The object replaced / side was alternated between test subjects and experimental groups to  
585 randomize for potential side-preferences in the arena. Exploration of an object was defined as the nose  
586 being within 2cm of the objects while facing them, and upon completion, all recordings/trackings were  
587 corrected for appropriate nose-tracking and exploration. The proportion of time spent exploring the objects  
588 were assessed by calculating a proportion of time exploring the novel object, using the following calculation  
589 The proportion of time spent exploring the objects were assessed by calculating a proportion of time  
590 exploring the novel object, using the following calculation from Ferdousi et al (29).

591  
592 
$$\text{Discrimination index} = \frac{\text{Time spent exploring novel} - \text{familiar object}}{\text{Time spent exploring novel} + \text{familiar object}}$$

593  
594  
595 Pinprick assay: Pinprick response score was measured by scoring the response to stimulation with a  
596 blunted acupuncture needle applied within the vibrissal pad of the rats. The scores were assigned as  
597 follows: 0=no response, 1=non-aversive response, 2=mild aversive response, 3=strong aversive  
598 response, 4=prolonged aversive behavior (30, 31). An increase in the response score is indicative of  
599 development of hypersensitivity.

600  
601 Locomotor activity: Mice were placed into individual photocell activity cages (28 x 16.5 cm; Omnitech,  
602 Columbus, OH) 60 min after i.p. saline or CBD3063 (9 mg/kg) administration (n=8/group; 50% male and  
603 50% female). Interruptions of the photocell beams (two banks of eight cells each) were then recorded for  
604 the next 60 min. Data were measured as the average number of photocell interruptions during the 60 min  
605 test period.

606  
607 **Pharmacokinetics of CBD3063 in mice.** The pharmacokinetics (PK) analysis of CBD3063 in mice was  
608 conducted by WuXi Aptec (Lab Testing Division, Cranbury NJ, USA). Three male C57BL/6 mice were  
609 injected intraperitoneally with a single dose of 9 mg/kg of CBD3063, and plasma samples were collected  
610 at 0.25, 0.5, 1, 2, 4, 8, and 24 hour post dosing time points. Briefly, blood samples (~30 µL) were  
611 collected into sample tubes and kept on ice, then plasma was extracted by centrifugation at 4°C, 3000g  
612 for 5 min. Plasma was promptly frozen on dry ice and stored at -70 ± 10 °C until analysis by LC-MS/MS.  
613 An aliquot of 20 µL sample was protein precipitated with 200 µL IS solution, the mixture was vortex-mixed  
614 well and centrifuged at 4000 rpm for 10 min, 4°C. An aliquot of 100 µL supernatant was transferred to  
615 sample plate, 100 µL H<sub>2</sub>O was added to each supernatant, then the plate was shake at 800 rpm for 10

616 min. 2  $\mu$ L supernatant was then injected for LC-MS/MS analysis. A calibration curve of 1-3000ng/mL for  
617 CBD3063 in blank mouse plasma and a set of QC samples consisting of low, middle and high  
618 concentrations were applied for the LC-MS/MS method. The pharmacokinetics of CBD3063 was analyzed  
619 using Phoenix WinNonlin software (version 8.3) and non-compartmental analysis model. The half-life ( $t_{1/2}$ )  
620 was calculated from a log-linear plot of concentration versus time.

621  
622 **Data Analysis.** Graphing and statistical analysis were performed with GraphPad Prism (Version 9), and  
623 in IBM SPSS for the ANCOVA. All data sets were checked for normality using D'Agostino & Pearson test.  
624 Details of statistical tests, significance and sample sizes are reported in the appropriate figure legends. All  
625 data plotted represent mean  $\pm$  SEM.

626  
627 -For western blot experiments, statistical differences between groups were determined by Mann-Whitney  
628 test. Statistical significance of confocal imaging data was evaluated by Mann-Whitney test.

629  
630 -For  $Ca^{2+}$  imaging experiments, data was analyzed by One-way ANOVA.

631  
632 -For electrophysiological recordings: Normalized peak currents were analyzed by Kruskal-Wallis test  
633 followed by the Dunn's post hoc test; the significance of the I-V curves was analyzed by multiple Mann-  
634 Whitney tests; peak current density as well as  $V_{1/2}$  midpoint potential and  $k$  slope factor were compared  
635 using Mann-Whitney test. For resting membrane potential and rheobase, the significance was analyzed  
636 by Mann-Whitney test; the significance of the number of evoked action potentials per step was analyzed  
637 by multiple Mann-Whitney tests; sEPSC frequency and amplitude were analyzed by paired t-tests; and  
638 cumulative probability by Kolmogorov-Smirnov test. iCGRP release was analyzed by 2-way ANOVA  
639 followed by Sidak's multiple comparisons test.

640  
641 -Mice: For behavioral data were male and female data are combined, 2-way ANOVA followed by Tukey  
642 post-hoc test did not show any significant sex's effect for the outcome measures. When male and female  
643 data are separated, results were also compared using two-way ANOVA with time and treatment, as  
644 factors and Tukey post-hoc test. AUC were analyzed by One-way ANOVA followed by Tukey or Dunnett  
645 post-hoc tests, in addition to Two-Way ANOVA (treatment\*sex) to assess sex-differences. An additional  
646 ANCOVA (treatment\*sex, covariate; immobility) analysis was performed in SPSS for the NOR-data, to  
647 assess the potential confounding effects of immobility on the outcome.

648  
649 Assessment of sex differences in CBD3063's efficacy: We found overall significant effects of sex on  
650 outcome measures like naïve cold aversion (**Fig. 6E**), thermal response latency (**Fig. 6F**), immobility in  
651 the Tail Suspension Test (**Fig. 6I**), and cold allodynia after SNI (**Fig. 5I**), but only for tail-flick assay (**Fig.**  
652 **6C**) was there a sex\*treatment interaction as GBP had greater effects in males than females. This  
653 suggests that despite sex-differences in general thresholds or response latencies, effects of CDB3063  
654 treatment were similar for both males and females. Sex was found to have no statistical influence on the  
655 treatment-effects of CBD3063 in SNI-, paclitaxel- or CFA- induced injury, and for simplicity these  
656 datasets are presented combined across the genders (see **Dataset 1** for full statistics).

657  
658  
659 -Rats: Behavioral data was analyzed by Multiple Mann-Whitney tests or two-way ANOVA with time and  
660 treatment, as factors and Bonferroni post-hoc test were performed.

661  
662 Detailed statistical analyses are presented in **Dataset 1**.

663  
664  
665  
666

667  
668

SI Figures and Legends.

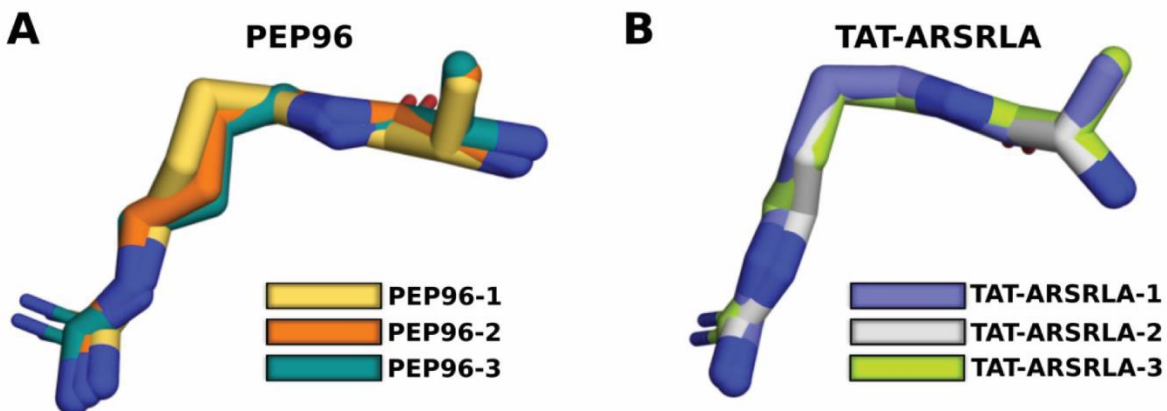

669  
670 **Figure S1. Cluster centers for three independent simulations of the PEP96 and TAT-ARSRLA.** The  
671 clusters are based on (A)  $A_1R_2$  (PEP96) and (B)  $A_{12}R_{13}$  (TAT-ARSRLA) with less than 1 Å from cluster  
672 center.  
673  
674  
675  
676  
677  
678  
679  
680  
681  
682  
683  
684  
685  
686  
687  
688  
689  
690  
691  
692  
693  
694  
695  
696  
697  
698  
699  
700  
701  
702  
703  
704  
705  
706  
707  
708



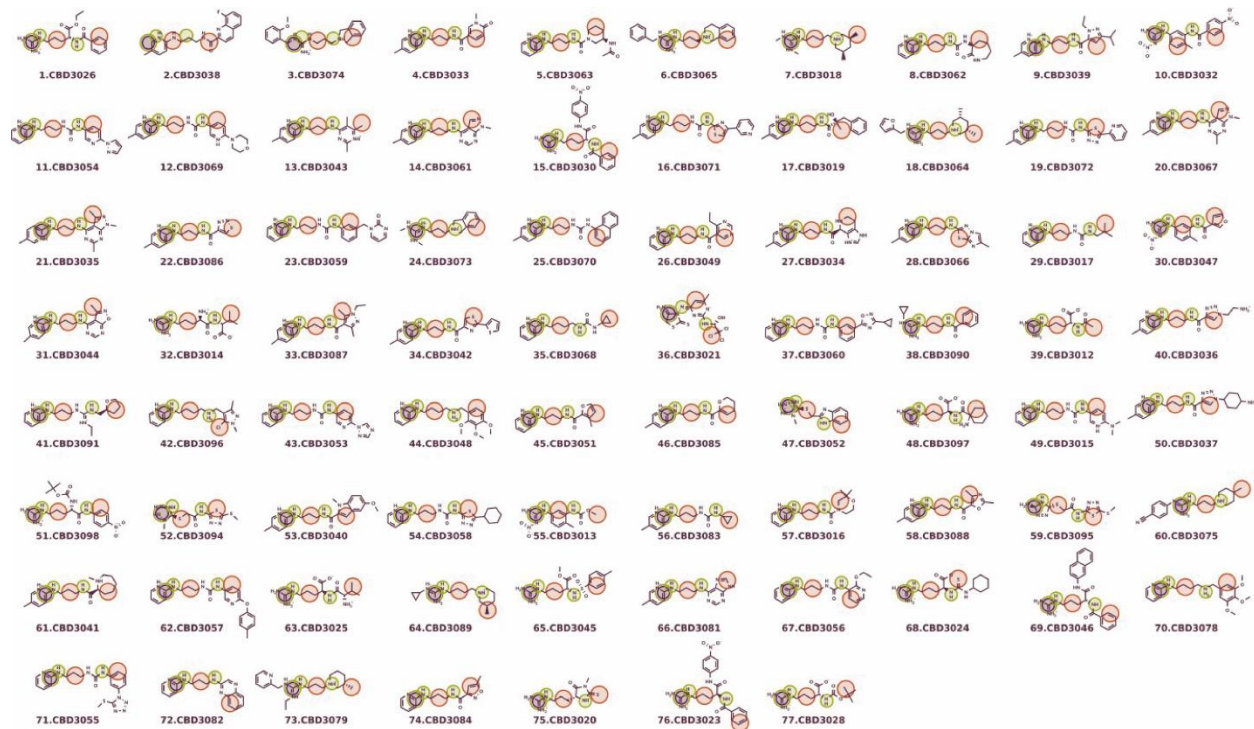

Figure S2. Full list of structures tested.

710  
711  
712  
713  
714  
715  
716  
717  
718  
719  
720  
721  
722  
723  
724  
725  
726  
727  
728  
729  
730  
731  
732  
733  
734  
735  
736  
737  
738  
739  
740  
741

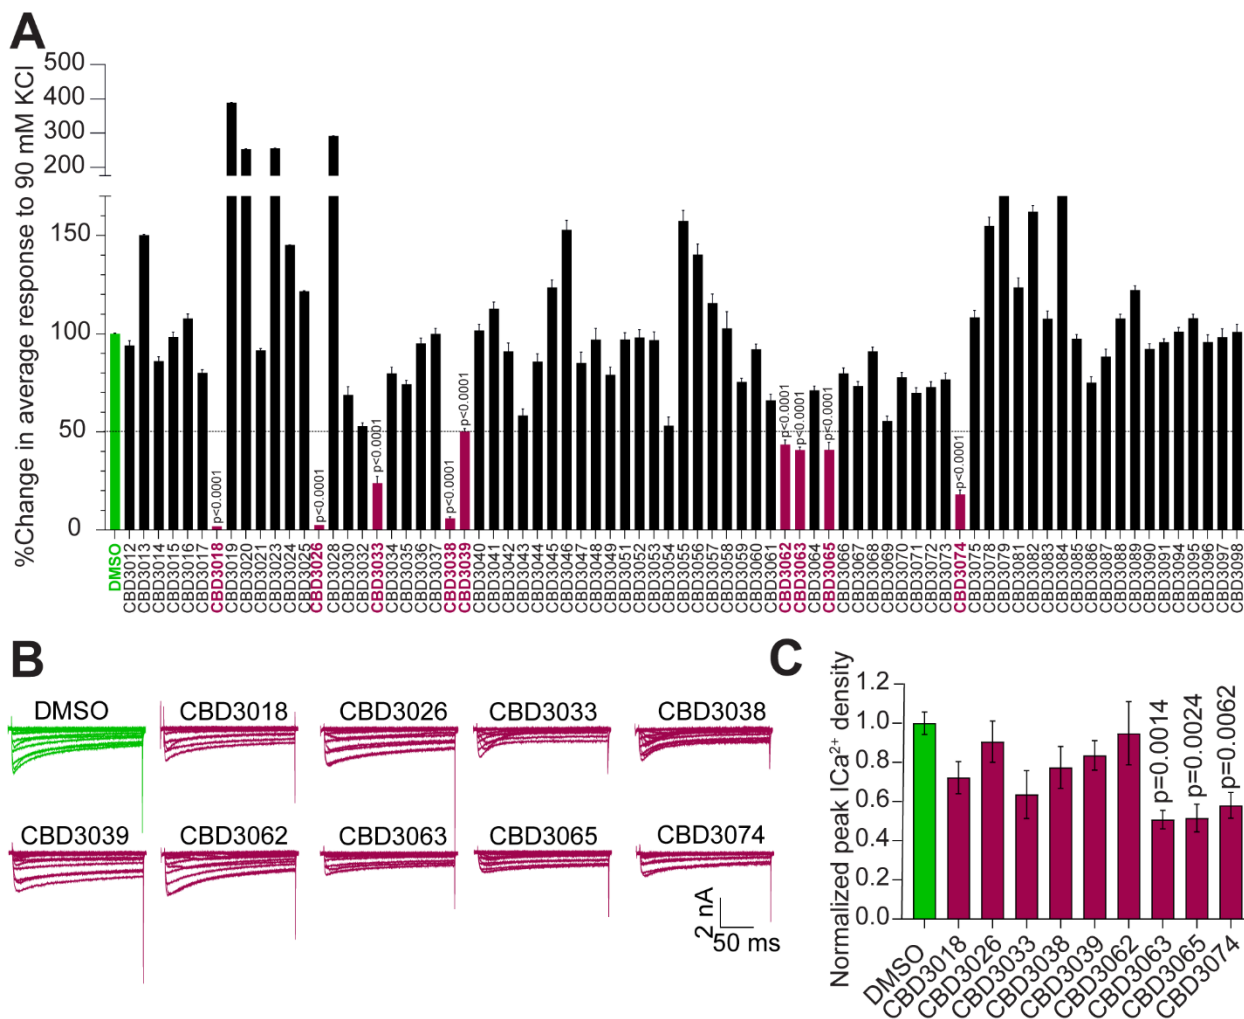

743  
 744 **Figure S3. Compound screening using depolarization-induced  $Ca^{2+}$  influx and whole-cell patch-clamp in DRG neurons identify various high-voltage-activated  $Ca^{2+}$  channels inhibitors.** (A) Percent  
 745 change in average response of DRG sensory neurons incubated overnight with 20  $\mu$ M of the indicated  
 746 compounds in response to 90 mM KCl.  $n=61-629$  cells; error bars indicate mean  $\pm$  SEM.  $p$  values as  
 747 indicated; One-Way ANOVA with the Dunnett post hoc test. Only the significances for the compounds  
 748 that inhibit  $Ca^{2+}$  influx more than 50% are shown in the plot. (B) Representative calcium current traces  
 749 recorded from small- to medium-sized DRGs incubated overnight with 0.1% DMSO or 20  $\mu$ M of test  
 750 compounds as indicated in the figure. Currents were evoked by 200-ms pulse between  $-70$  and  $+60$  mV.  
 751 (C) Summary of bar graph showing the normalized peak total  $ICa^{2+}$  density. CBD3063, 3065 and 3074  
 752 significantly decreased total  $Ca^{2+}$  currents.  $n=16-98$  cells (indicated in parenthesis) from seven separate  
 753 rats; error bars indicate mean  $\pm$  SEM;  $p$  values as indicated; Kruskal-Wallis test followed by Dunn's post  
 754 hoc test. See **Dataset 1** for full statistics.  
 755  
 756  
 757  
 758  
 759  
 760

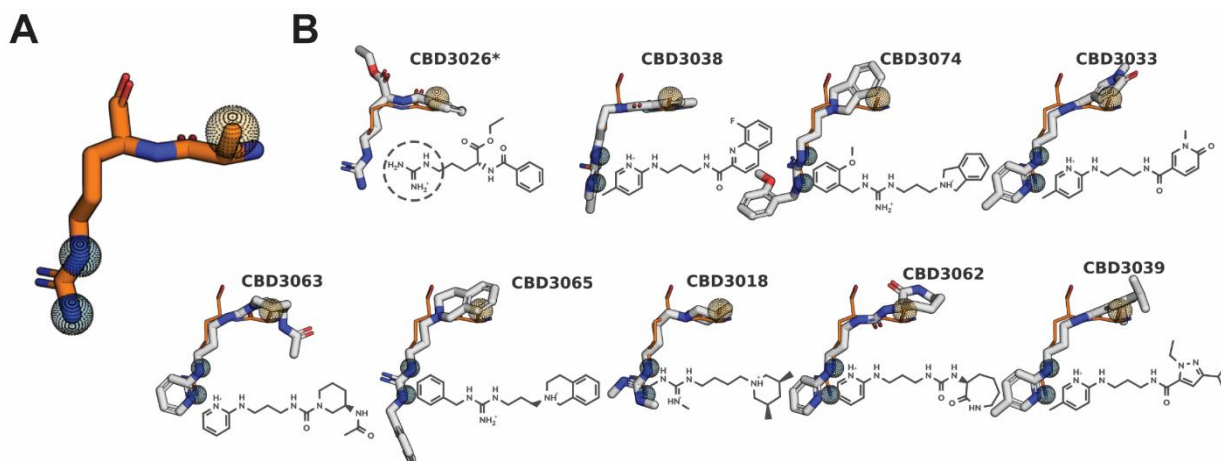

761  
 762 **Figure S4. Shared chemotypes.** (A)  $A_1R_2$  cluster center highlighting three pharmacophores present in all  
 763 compounds except CBD3026\*. (B) Structures of compounds obtained from the ZincPharmer  
 764 screen which were found to inhibit  $Ca^{2+}$  influx by more than 50% (Fig. S3). Dashed circle shows  
 765 guanidine group (arginine).  
 766  
 767  
 768  
 769  
 770  
 771  
 772  
 773  
 774  
 775  
 776  
 777  
 778  
 779  
 780  
 781  
 782  
 783  
 784  
 785  
 786  
 787  
 788  
 789  
 790  
 791  
 792  
 793  
 794  
 795  
 796  
 797  
 798  
 799  
 800  
 801

802

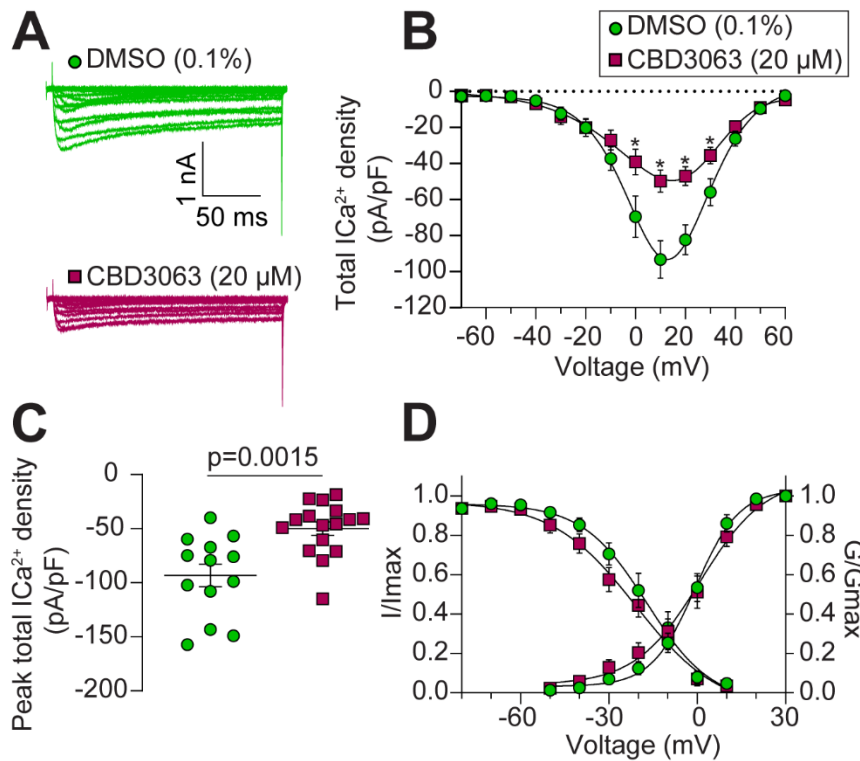

803  
804  
805  
806  
807  
808  
809  
810  
811  
812  
813  
814  
815  
816  
817  
818  
819  
820  
821  
822  
823  
824  
825  
826  
827  
828  
829  
830  
831  
832  
833

**Figure S5. CBD3063 reduces total calcium currents in DRG neurons.** (A) Representative calcium current traces recorded from small- to medium-sized DRGs incubated overnight with 20  $\mu$ M of CBD3063 as indicated in the figure. Currents were evoked by 200-ms pulse between -70 and +60 mV. (B) Double Boltzmann fits for current density-voltage curve. Asterisk (\*) indicate  $p < 0.05$ ; Multiple Mann-Whitney tests. (C) Summary of bar graph showing peak calcium current densities (pA/pF). CBD3063 decreased total  $Ca^{2+}$  current density.  $p$  value as indicated; Mann-Whitney test. (D) Boltzmann fits for voltage-dependent activation and inactivation as shown. Half-maximal activation potential of activation and inactivation ( $V_{1/2}$ ) and slope values ( $k$ ) for activation and inactivation are presented in **Table S2**.  $n=13-16$  cells from four separate rats; error bars indicate mean  $\pm$  SEM. See **Dataset 1** for full statistics.

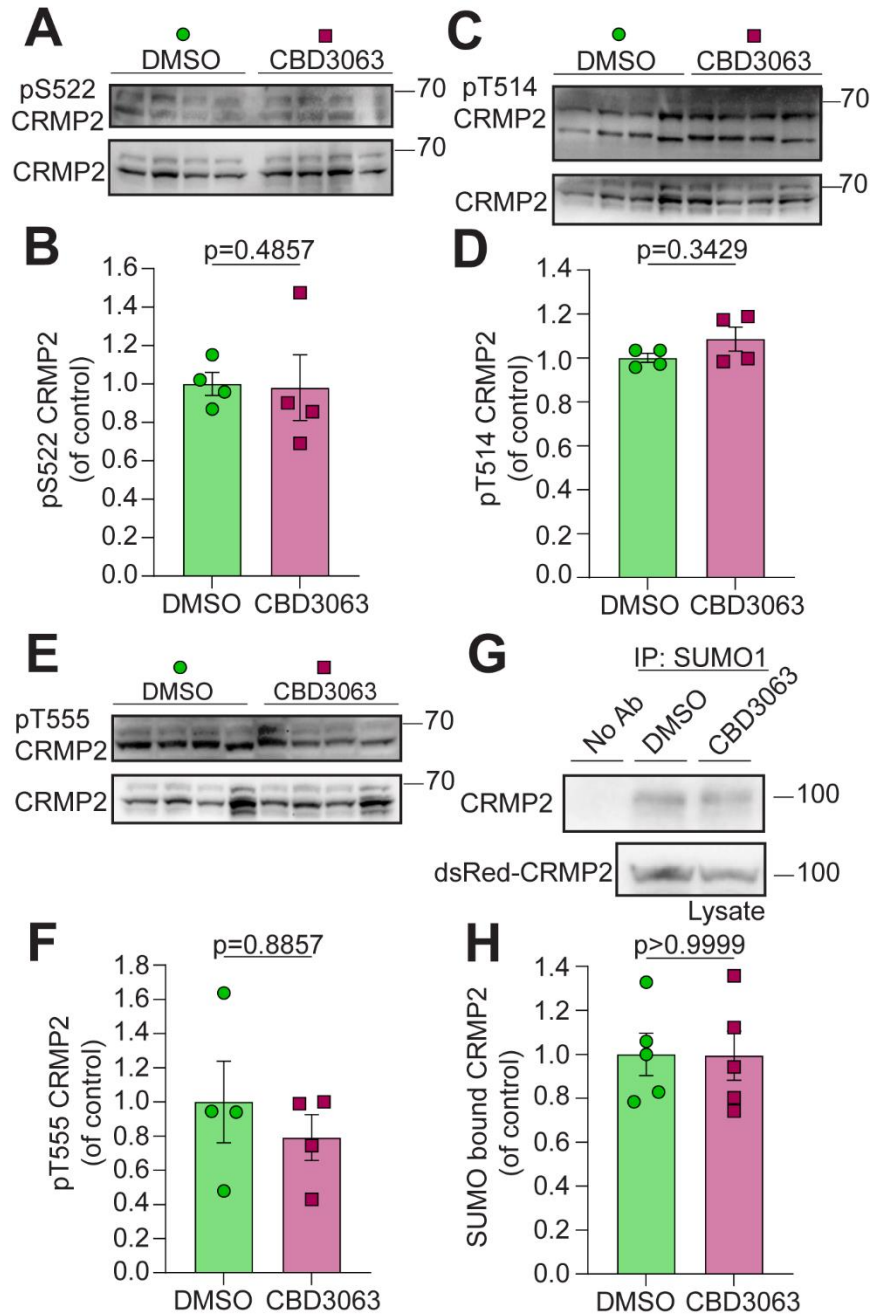

834  
835  
836  
837  
838  
839  
840  
841  
842  
843  
844  
845  
846

**Figure S6. CBD3063 does not affect CRMP2 phosphorylation nor SUMOylation.** Representative immunoblots (A, C and E) and quantitative analysis (B, D and F) of total and phosphorylated CRMP2 at the indicated kinase target sites from CAD cells treated overnight with 0.1% DMSO (as control) or 20  $\mu$ M CBD3063 ( $n = 4$  independent assays). Representative immunoblots (G) and summary (H) of SUMOylated CRMP2 from CAD cells transfected with dsRed-CRMP2 plasmid and treated overnight with 0.1% DMSO or 20  $\mu$ M CBD3063 ( $n = 5$  independent assays). Error bars show mean  $\pm$  SEM;  $p$  values as indicated; Mann-Whitney test.

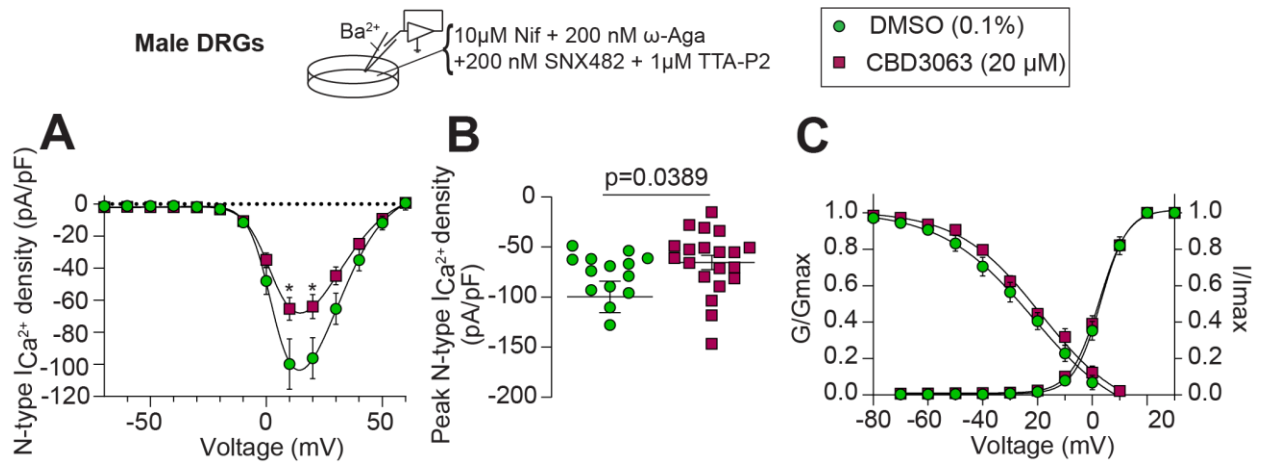

847  
848  
849  
850  
851  
852  
853  
854  
855  
856  
857  
858

**Figure S7. CBD3063 inhibits N-type calcium currents in male DRG neurons.** *Top:* schematic showing composition of bath solution used to isolate N-type currents. (A) Double Boltzmann fits for current density–voltage curve of N-type calcium currents recorded from small– to medium–sized DRGs incubated overnight with 20 μM of CBD3063. Asterisks denote  $p$  values of less than 0.05; Mann-Whitney test. (B) Summary of bar graph showing peak calcium current densities (pA/pF). CBD3063 reduced  $Ca_v2.2$   $Ca^{2+}$  current density.  $p$  values indicated; Mann-Whitney test. (C) Boltzmann fits for voltage-dependent activation and inactivation as shown. Half-maximal activation potential of activation and inactivation ( $V_{1/2}$ ) and slope values ( $k$ ) for activation and inactivation are presented in **Table S2**.  $n=14-21$  cells from three separate rats; error bars indicate mean  $\pm$  SEM. See **Dataset 1** for full statistics.



859  
860

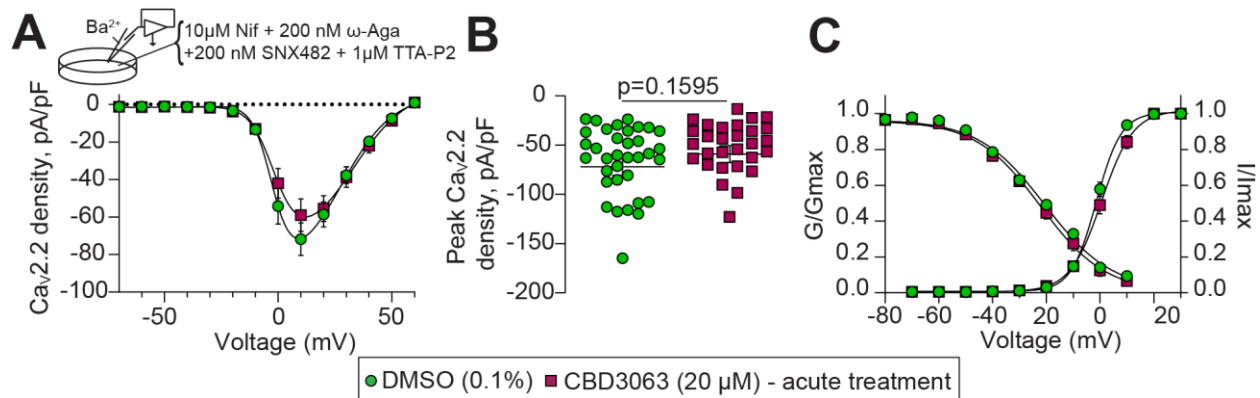

861  
862  
863  
864  
865  
866  
867  
868  
869  
870  
871  
872  
873  
874  
875  
876  
877  
878  
879  
880  
881  
882  
883  
884  
885  
886  
887  
888  
889  
890  
891  
892  
893  
894  
895  
896  
897  
898  
899  
900  
901  
902

**Figure S8. Acute application (15 min) of CBD3063 does not affect N-type calcium currents in DRG neurons.** (A) *Top*: composition of bath solution used to isolate N-type currents. *Bottom*: Double Boltzmann fits for current density–voltage curve of N-type calcium currents recorded from small– to medium–sized DRGs incubated 15 minutes with 20  $\mu M$  of CBD3063 as indicated in the figure. No statistical significance was observed after applying a Multiple Mann-Whitney tests. (B) Summary of bar graph showing peak calcium current densities (pA/pF). CBD3063 did not affect  $Cav_{2.2}$   $Ca^{2+}$  current density.  $p$  value as indicated; Mann-Whitney test. (C) Boltzmann fits for voltage-dependent activation and inactivation as shown. Half-maximal activation potential of activation and inactivation ( $V_{1/2}$ ) and slope values ( $k$ ) for activation and inactivation are presented in **Table S2**.  $n=30$ -36 cells from three separate rats; error bars indicate mean  $\pm$  SEM. See **Dataset 1** for full statistics.

903  
904

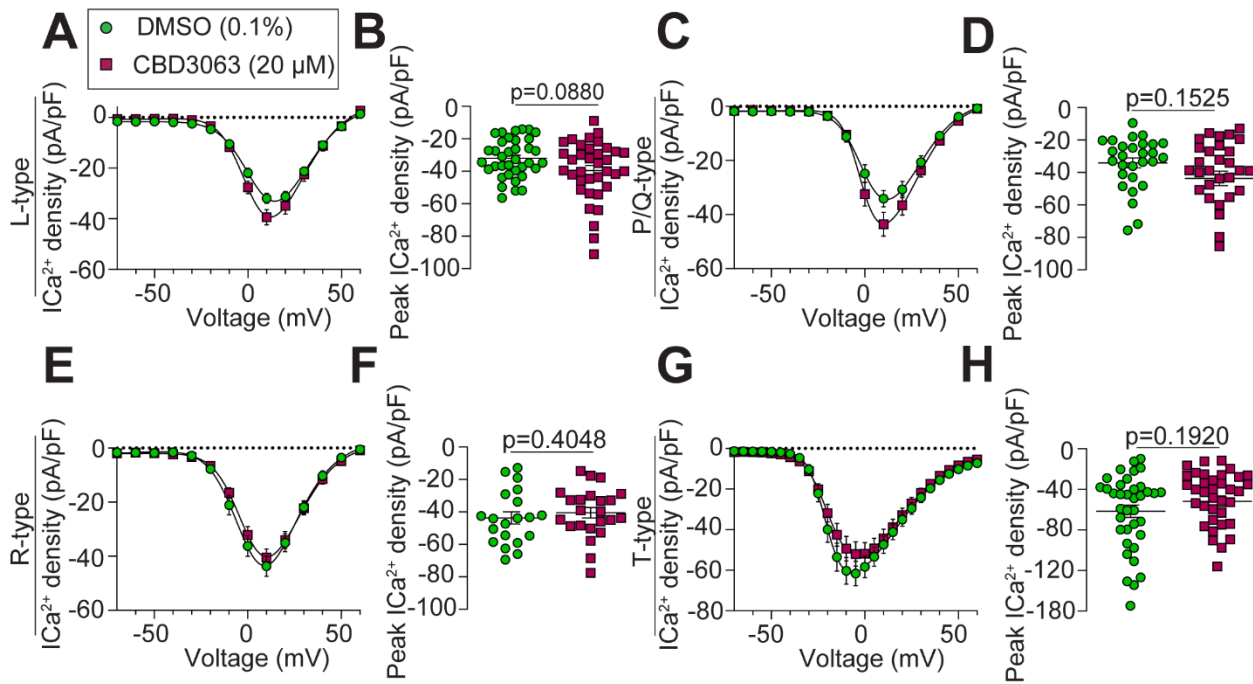

905  
906  
907  
908  
909  
910  
911  
912  
913  
914  
915  
916  
917  
918  
919  
920  
921  
922  
923  
924  
925  
926  
927  
928  
929  
930  
931  
932  
933  
934  
935  
936  
937

**Figure S9. CBD3063 does not inhibit the activity of other voltage-gated calcium channel isoforms.** (A, C, E, G) L-, P/Q-, R-, and T-type current density–voltage curves, respectively. No statistical significances were observed after applying Multiple Mann-Whitney tests. (B, D, F, H) Summary of bar graph showing peak L-, P/Q-, R-, and T-type calcium current densities (pA/pF), respectively. CBD3063 did not affect any of these currents after overnight incubation. *p* value as indicated; Mann-Whitney test. *n*=36 cells from seven separate rats (L-type); *n*=28-31 cells from five separate rats (P/Q-type); *n*=20-23 cells from three separate rats (R-type); *n*=37 cells from seven separate rats (T-type); Error bars indicate mean ± SEM; Half-maximal activation potential ( $V_{1/2}$ ) and slope values ( $k$ ) for activation and inactivation are presented in **Table S2**. See **Dataset 1** for full statistics.

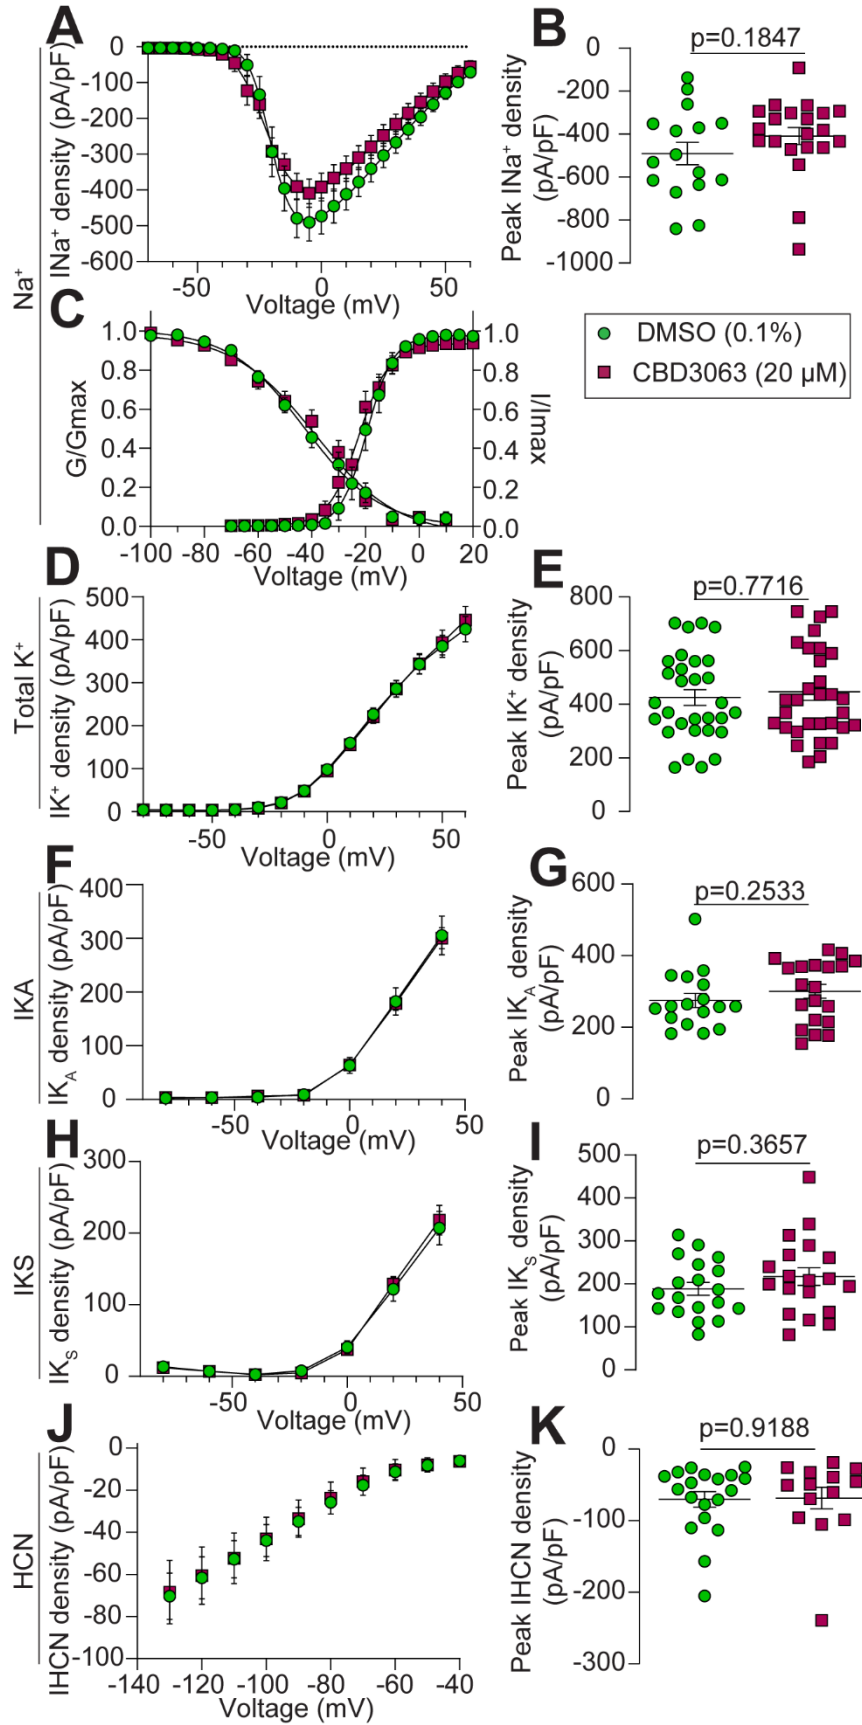

939 **Figure S10. Overnight incubation with CBD3063 does not affect total sodium, total potassium,  $I_{K_A}$ ,**  
940  **$I_{K_S}$  or HCN currents in DRG neurons.** (A) Boltzmann fits for current density–voltage curve. Sodium  
941 currents were recorded from small– to medium–sized DRGs incubated overnight with 20  $\mu$ M of CBD3063  
942 as indicated in the figure. Currents were evoked by 150-ms pulse between  $-70$  and  $+60$  mV. (B)  
943 Summary of bar graph showing peak sodium current densities (pA/pF).  $p$  value as indicated; Mann-  
944 Whitney test. (C) Boltzmann fits for voltage-dependent activation and inactivation as shown. Half-maximal  
945 activation potential of activation and inactivation ( $V_{1/2}$ ) and slope values ( $k$ ) for activation and inactivation  
946 are presented in **Table 2**.  $n=16-21$  cells from three separate rats. (D) Current density-voltage curves of  
947 total potassium currents recorded from sensory neurons in the presence of 0.1% DMSO or 20  $\mu$ M  
948 CBD3063. Currents were evoked by 300-ms pulse between  $-80$  and  $+60$  mV. (E) Summary of peak  
949 potassium current densities (pA/pF).  $n=30-32$  cells from four separate rats;  $p$  values as indicated; Mann-  
950 Whitney test. (F) Current density-voltage curves of  $I_{K_A}$  potassium currents recorded from sensory  
951 neurons in the presence of 0.1% DMSO or 20  $\mu$ M CBD3063. Currents were evoked by applying a 4-s pre-  
952 pulse to  $-100$  mV followed by voltage steps of 500 milliseconds that ranged from  $-80$  to  $+40$  mV in  $+20$ -  
953 mV increments at 15-s intervals. (G) Summary of peak  $I_{K_A}$  current densities (pA/pF).  $n=18-20$  cells from  
954 two separate rats;  $p$  values as indicated; Mann-Whitney test. (H) Current density-voltage curves of  $I_{K_S}$   
955 potassium currents recorded from sensory neurons in the presence of 0.1% DMSO or 20  $\mu$ M CBD3063.  
956 Currents were evoked by applying a conditioning 4-sec pre-pulse to  $-40$  mV followed by voltage steps of  
957 500 milliseconds that ranged from  $-80$  to  $+40$  mV in  $+20$ -mV increments at 15-s intervals. (I) Summary of  
958 peak  $I_{K_S}$  current densities (pA/pF).  $n=19-20$  cells from two separate rats;  $p$  values as indicated; Mann-  
959 Whitney test. (J) Current density-voltage curves of HCN currents recorded from sensory neurons in the  
960 presence of 0.1% DMSO or 20  $\mu$ M CBD3063. Currents were evoked by applying 5000-millisecond  
961 voltage steps from  $-130$  to  $-40$  mV in 10-mV increments. (K) Summary of HCN peak current densities  
962 (pA/pF).  $n=14-19$  cells from two separate rats;  $p$  values as indicated; Mann-Whitney test. Error bars  
963 indicate mean  $\pm$  SEM. See **Dataset 1** for full statistics.

964  
965  
966  
967  
968  
969  
970  
971  
972  
973  
974  
975  
976  
977  
978  
979  
980  
981  
982  
983  
984  
985  
986  
987  
988  
989  
990  
991  
992  
993

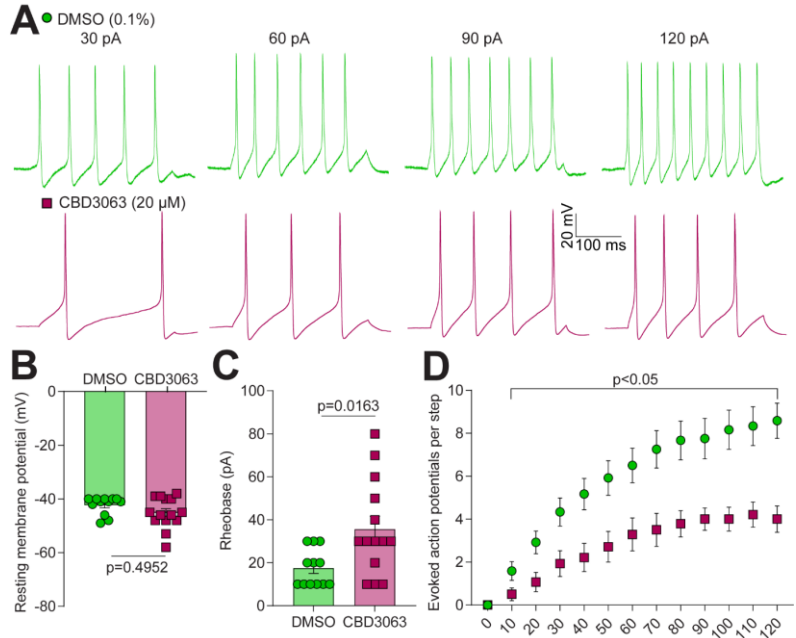

994  
 995 **Figure S11. Sensory neuron excitability is decreased by overnight incubation of CBD3063.** (A)  
 996 Representative action potential traces in response to the indicated current injection steps obtained from  
 997 rat DRG neurons treated with 0.1% DMSO (control) or 20 μM CBD3063. (B) Quantification of resting  
 998 membrane potential in millivolts (mV) in the two conditions. (C) Quantification of the rheobase in the  
 999 presence of DMSO or 20 μM CBD3063. (D) Summary of the number of evoked action potentials in  
 1000 response to current injection between 0-120 pA. N=12-14 cells from three separate rats; *p* value as  
 1001 indicated; Mann-Whitney test (B and C) and Multiple Mann-Whitney test. Error bars indicate mean ± SEM.  
 1002 See **Dataset 1** for full statistics.

1003  
 1004  
 1005  
 1006  
 1007  
 1008  
 1009  
 1010  
 1011  
 1012  
 1013  
 1014  
 1015  
 1016

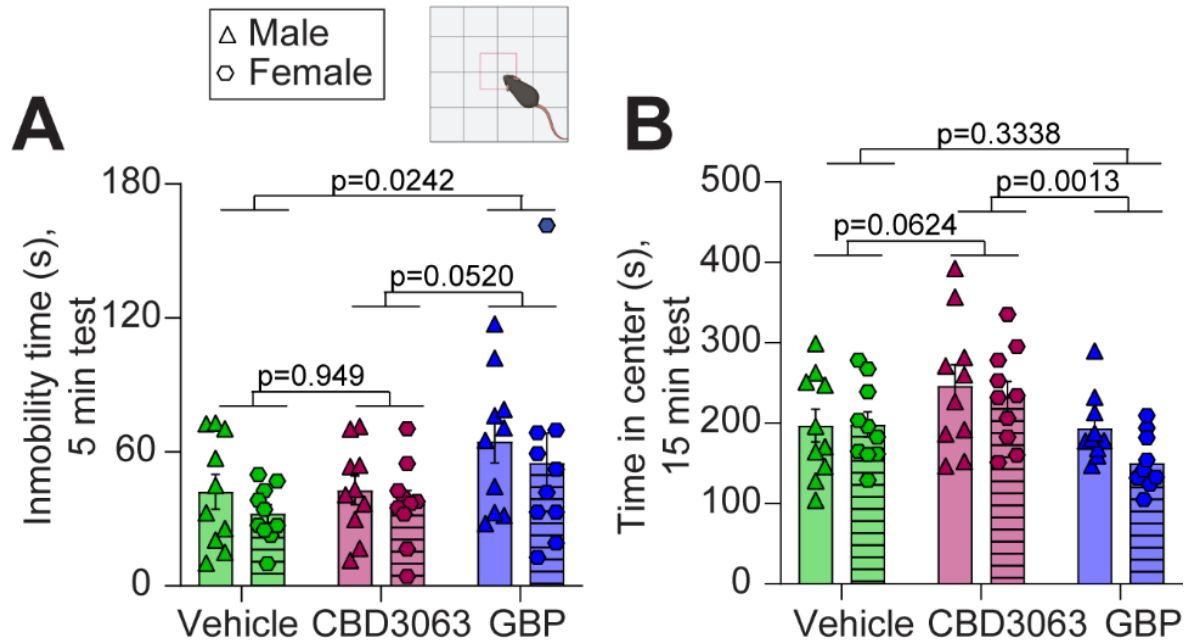

1017  
 1018  
 1019  
 1020  
 1021  
 1022  
 1023  
 1024  
 1025  
 1026  
 1027  
 1028  
 1029  
 1030  
 1031  
 1032  
 1033  
 1034  
 1035  
 1036  
 1037  
 1038  
 1039  
 1040  
 1041  
 1042  
 1043  
 1044  
 1045  
 1046  
 1047  
 1048  
 1049  
 1050  
 1051  
 1052

**Figure S12. CBD3063 produced beneficial effects on anxiety-like and mobility-related behavior when compared with gabapentin.** (A) Gabapentin (GBP; 30 mg/kg) produced sedative-like behaviors when compared with vehicle (10% DMSO in saline), and CBD3063 (10 mg/kg), as assessed by the duration of immobility in the Open Field during a 5-minute test, confirming the results found during the full 15-minute test (Figure 8G). (B) CBD3063 showed anxiolytic-like effects when compared with GBP and vehicle, as assessed by time spent in the center of the Open Field during a 15-minute test, confirming the results found during the first 5-minute of the test (Figure 8H). Injections were given intraperitoneal 2 hours before the test. N=10 mice per group. Results were compared using two-way ANOVA with time and treatment, as factors and Tukey post-hoc test. *p* values as indicated; Values are expressed as mean ± SEM. See **Dataset 1** for full statistics.



1053

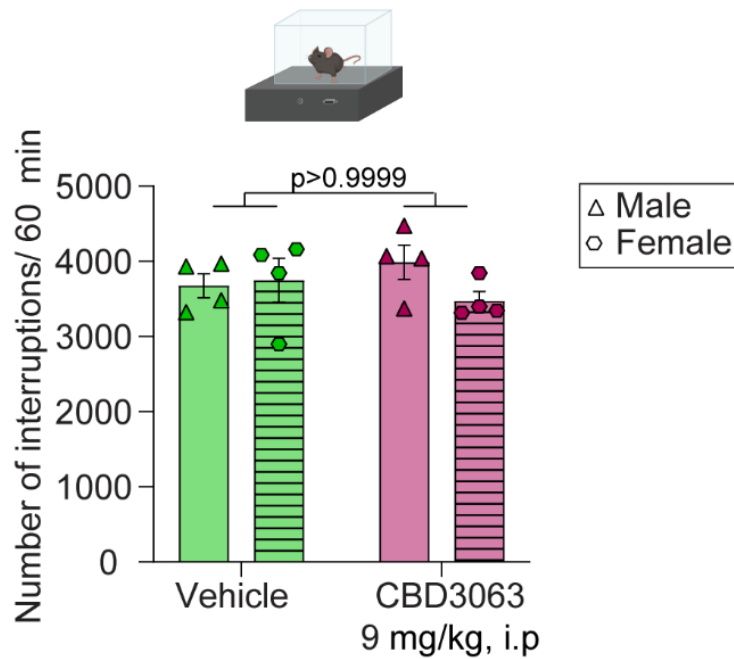

1054

1055

**Figure S13. CBD3063 has no effect on locomotor activity in mice after i.p injection of paclitaxel (8 mg/kg).** Values are expressed as mean  $\pm$  SEM. Mice were tested 60 min after i.p. injection of CBD3063 (9 mg/kg) or saline and activity was measured for 60 min. CBD3063 (9 mg/kg, i.p) did not affect locomotor activity (Number of interruptions in 60 minutes) when compared to vehicle (saline)-treated mice. N=8 mice per group. Results were compared using two-way ANOVA with time and treatment, as factors and Tukey post-hoc test. *p* values as indicated; Values are expressed as mean  $\pm$  SEM. See **Dataset 1** for full statistics.

1056

1057

1058

1059

1060

1061

1062

1063

1064

1065

1066

1067

1068

1069

1070

1071

1072

1073

1074

1075

1076

1077

1078

1079

1080

1081

1082

1083

1084

1085

1086

1087  
1088

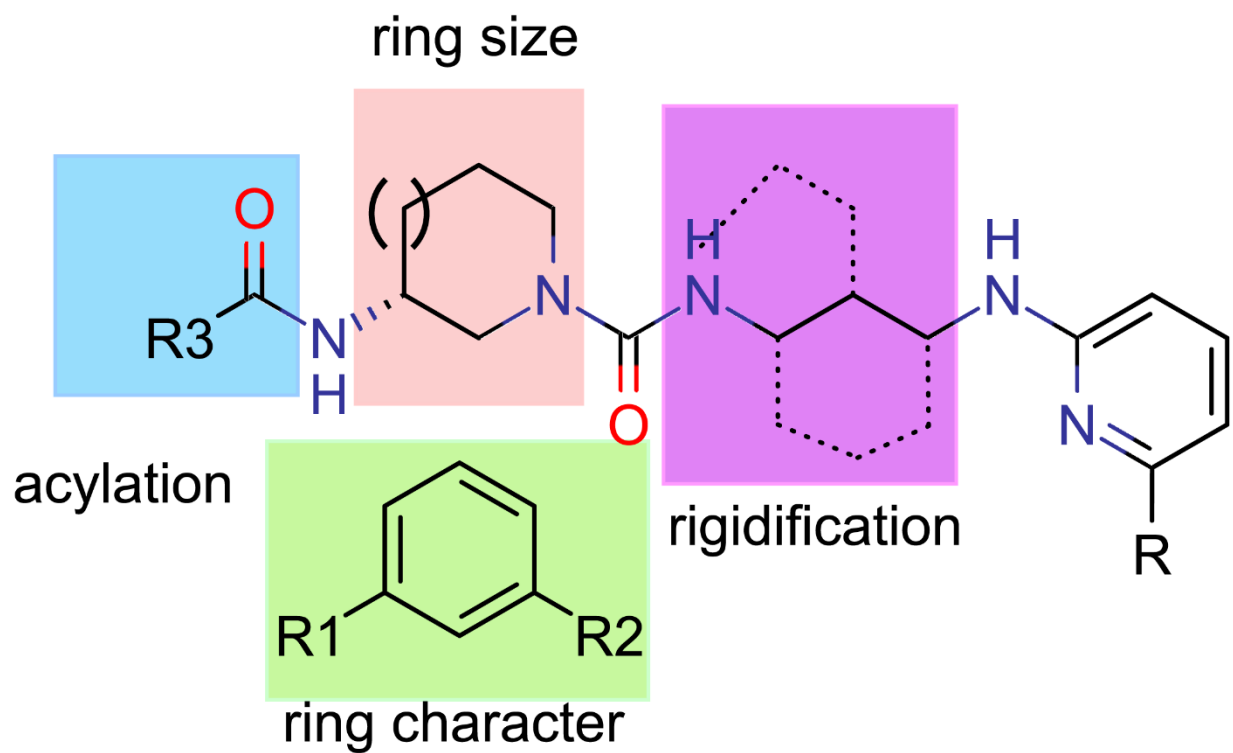

1089  
1090  
1091  
1092  
1093  
1094  
1095  
1096  
1097  
1098

**Figure S14.** Molecule structure highlighting the areas to optimize. Blue, acylation. Pink, ring size. Magenta, rigidification. Green, ring character.

1099 **Table S1.** Calculated properties of compounds inhibiting Ca<sup>2+</sup> influx by more than 50%.  
1100

| ID      | IUPAC Name                                                                          | Compound class                    | Mw    | BBB | logS (7.4) | cLogP | HBD | HBA | RO5 | NHOH | Rot B | TPSA  | QED  |
|---------|-------------------------------------------------------------------------------------|-----------------------------------|-------|-----|------------|-------|-----|-----|-----|------|-------|-------|------|
| CBD3018 | (Z)-N'-{4-[(3R,5S)-3,5-dimethylpiperidin-1-yl]butyl}-N,N''-dimethylguanidine        | Guanidines                        | 254.4 | 4.2 | 0.90       | 1.54  | 2   | 2   | Y   | 2    | 5     | 39.7  | 0.44 |
| CBD3026 | ethyl N-benzoyl-(R)-arginine                                                        | Guanidines                        | 306.4 | 2.2 | 0.00       | 0.61  | 4   | 4   | Y   | 5    | 8     | 117.3 | 0.24 |
| CBD3033 | 1-methyl-N-{3-[(5-methylpyridin-2-yl)amino]propyl}-6-oxopyridine-3-carboxamide      | 2-aminopyridylpropyl-carboxamides | 300.4 | 4.0 | -1.70      | 1.32  | 2   | 5   | Y   | 2    | 6     | 76.0  | 0.79 |
| CBD3038 | 8-fluoro-N-{3-[(5-methylpyridin-2-yl)amino]propyl}quinoline-2-carboxamide           | 2-aminopyridylpropyl-carboxamides | 338.4 | 4.2 | -4.10      | 3.31  | 2   | 4   | Y   | 2    | 6     | 66.9  | 0.68 |
| CBD3039 | 2-ethyl-5-isopropyl-N-{3-[(5-methylpyridin-2-yl)amino]propyl}pyrazole-3-carboxamide | 2-aminopyridylpropyl-carboxamides | 329.4 | 4.2 | -2.90      | 2.96  | 2   | 5   | Y   | 2    | 8     | 71.8  | 0.73 |
| CBD3062 | 1-[(3S)-2-oxoazepan-3-yl]-3-[3-(pyridin-2-ylamino)propyl]urea                       | 2-aminopyridylpropylureas         | 305.4 | 2.9 | -1.90      | 0.85  | 4   | 4   | Y   | 4    | 6     | 95.2  | 0.59 |
| CBD3063 | (3R)-3-acetamido-N-[3-(pyridin-2-ylamino)propyl]piperidine-1-carboxamide            | 2-aminopyridylpropylureas         | 319.4 | 3.8 | -2.00      | 1.19  | 3   | 4   | Y   | 3    | 6     | 86.4  | 0.69 |
| CBD3065 | N'-benzyl-N-[3-(3,4-dihydro-1H-isoquinolin-2-yl)propyl]guanidine                    | Guanidines                        | 322.5 | 4.6 | 0.00       | 2.75  | 3   | 2   | Y   | 3    | 6     | 51.2  | 0.44 |
| CBD3074 | N-[3-(1,3-dihydroisoindol-2-yl)propyl]-N'-[(2-methoxyphenyl)methyl]guanidine        | Guanidines                        | 338.5 | 4.2 | 0.00       | 2.72  | 3   | 3   | Y   | 3    | 7     | 60.4  | 0.41 |

1101 Compounds identified as active in calcium imaging (**Figure S3**). Mw, molecular weight (Da); BBB score,  
1102 indicates probability of compound having CNS exposure where scores in the range [4-6] correctly  
1103 predicted 90.3% of CNS drugs (32); LogS(7.4), predicted solubility (M) at pH 7.4; cLogP, predicted  
1104 lipophilicity coefficient in octanol/water; HBD, number of hydrogen-bond donors; HBA, number of  
1105 hydrogen bond acceptors; RO5, binary (Y/N) assignment of complying with Lipinski rule-of-5 (33);  
1106 NHOH, number of polar NH and OH hydrogens; RotB, number of rotatable bonds; TPSA, topological  
1107 polar surface area (Å<sup>2</sup>); QED, Quantitative Estimate of Druglikeness where a score of 1 indicates all  
1108 properties are favorable (34). Properties calculated with RDKit and ChemAxon modules.  
1109

1110 **Table S2.** Gating properties of ionic currents recorded from rat DRG neurons in the presence of  
 1111 CBD3063.

|                                                                 | DMSO                 | CBD3063              |
|-----------------------------------------------------------------|----------------------|----------------------|
| Total Ca <sup>2+</sup> currents (Figure S5)                     |                      |                      |
| Activation                                                      |                      |                      |
| $V_{1/2}$                                                       | -0.665 ± 1.091 (13)  | 0.971 ± 2.338 (16)   |
| $k$                                                             | 7.429 ± 0.991 (13)   | 11.004 ± 2.181 (16)  |
| Inactivation                                                    |                      |                      |
| $V_{1/2}$                                                       | -17.081 ± 2.647 (13) | -20.944 ± 3.182 (16) |
| $k$                                                             | -10.916 ± 2.186 (13) | -14.132 ± 2.880 (16) |
| N-type Ca <sup>2+</sup> currents (Figure 2)                     |                      |                      |
| Activation                                                      |                      |                      |
| $V_{1/2}$                                                       | -2.234 ± 0.421 (32)  | -2.446 ± 0.471 (36)  |
| $k$                                                             | 5.184 ± 0.369 (32)   | 5.822 ± 0.410 (36)   |
| Inactivation                                                    |                      |                      |
| $V_{1/2}$                                                       | -21.190 ± 1.697 (32) | -22.482 ± 2.389 (36) |
| $k$                                                             | -15.833 ± 1.293 (32) | -17.446 ± 1.868 (36) |
| N-type Ca <sup>2+</sup> currents (Male rats; figure S7)         |                      |                      |
| Activation                                                      |                      |                      |
| $V_{1/2}$                                                       | 3.064 ± 0.480 (16)   | 2.549 ± 0.383 (20)   |
| $k$                                                             | 4.868 ± 0.404 (16)   | 5.204 ± 0.330 (20)   |
| Inactivation                                                    |                      |                      |
| $V_{1/2}$                                                       | -21.669 ± 3.247 (16) | -18.878 ± 2.118 (20) |
| $k$                                                             | 16.679 ± 2.491 (16)  | 15.047 ± 1.531 (20)  |
| N-type Ca <sup>2+</sup> currents (Acute application; figure S8) |                      |                      |
| Activation                                                      |                      |                      |
| $V_{1/2}$                                                       | -1.418 ± 0.288 (36)  | 0.586 ± 0.500 (30)   |
| $k$                                                             | 4.667 ± 0.266 (36)   | 5.878 ± 0.443 (30)   |
| Inactivation                                                    |                      |                      |
| $V_{1/2}$                                                       | -20.536 ± 1.253 (36) | -22.078 ± 1.418 (30) |
| $k$                                                             | -12.349 ± 0.986 (36) | -12.093 ± 1.155 (30) |
| L-type Ca <sup>2+</sup> currents (Figure S9)                    |                      |                      |
| Activation                                                      |                      |                      |
| $V_{1/2}$                                                       | 0.274 ± 0.513 (36)   | -1.957 ± 0.402 (36)  |
| $k$                                                             | 6.423 ± 0.449 (36)   | 5.267 ± 0.355 (36)   |
| Inactivation                                                    |                      |                      |
| $V_{1/2}$                                                       | -13.503 ± 0.890 (36) | -15.370 ± 0.933 (36) |
| $k$                                                             | -9.371 ± 0.750 (36)  | -8.188 ± 0.803 (36)  |
| P/Q-type Ca <sup>2+</sup> currents (Figure S9)                  |                      |                      |
| Activation                                                      |                      |                      |
| $V_{1/2}$                                                       | -1.644 ± 0.527 (28)  | -2.086 ± 0.363 (31)  |
| $k$                                                             | 5.301 ± 0.469 (28)   | 4.566 ± 0.324 (31)   |
| Inactivation                                                    |                      |                      |
| $V_{1/2}$                                                       | -14.833 ± 1.217 (28) | -13.091 ± 0.791 (31) |
| $k$                                                             | -10.130 ± 1.028 (28) | -9.191 ± 0.666 (31)  |
| R-type Ca <sup>2+</sup> currents (Figure S9)                    |                      |                      |
| Activation                                                      |                      |                      |
| $V_{1/2}$                                                       | -4.688 ± 0.615 (20)  | -3.688 ± 0.625 (23)  |
| $k$                                                             | 6.365 ± 0.519 (20)   | 6.421 ± 0.524 (23)   |
| Inactivation                                                    |                      |                      |
| $V_{1/2}$                                                       | -24.330 ± 2.384 (20) | -18.422 ± 1.461 (23) |
| $k$                                                             | -17.194 ± 2.251 (20) | -12.260 ± 1.256 (23) |
| T-type Ca <sup>2+</sup> currents (Figure S9)                    |                      |                      |
| Activation                                                      |                      |                      |
| $V_{1/2}$                                                       | -20.044 ± 0.421 (37) | -19.529 ± 0.647 (37) |
| $k$                                                             | 4.800 ± 0.368 (37)   | 6.684 ± 0.581 (37)   |
| Inactivation                                                    |                      |                      |
| $V_{1/2}$                                                       | -40.758 ± 1.046 (37) | -40.757 ± 1.129 (37) |
| $k$                                                             | -11.305 ± 0.994 (37) | -11.606 ± 1.078 (37) |
| Na <sup>+</sup> currents (Figure S10)                           |                      |                      |
| Activation                                                      |                      |                      |
| $V_{1/2}$                                                       | -19.288 ± 0.625 (16) | -22.340 ± 0.686 (21) |
| $k$                                                             | 4.955 ± 0.547 (16)   | 5.752 ± 0.606 (21)   |
| Inactivation                                                    |                      |                      |
| $V_{1/2}$                                                       | -42.563 ± 1.843 (16) | -38.767 ± 2.083 (21) |
| $k$                                                             | -14.098 ± 1.895 (16) | -15.283 ± 2.173 (21) |

1112 Values are means ± SEM calculated from fits of the data from the indicated number of individual cells (in  
 1113 parentheses) to the Boltzmann equation;  $V_{1/2}$  midpoint potential (mV) for voltage-dependent of activation or  
 1114 inactivation;  $k$ , slope factor. Data were analyzed with Mann-Whitney test.

1115 **SI References**

- 1116 1. S. Cai *et al.*, Selective targeting of Nav1.7 via inhibition of the CRMP2-Ubc9 interaction reduces  
1117 pain in rodents. *Sci Transl Med* **13**, eabh1314 (2021).
- 1118 2. Y. Zheng *et al.*, Tuning microtubule dynamics to enhance cancer therapy by modulating FER-  
1119 mediated CRMP2 phosphorylation. *Nat Commun* **9**, 476 (2018).
- 1120 3. D. A. Case *et al.* (2018) AMBER 2018. (University of California, San Francisco).
- 1121 4. A. W. Götz *et al.*, Routine Microsecond Molecular Dynamics Simulations with AMBER on GPUs.  
1122 1. Generalized Born. *J Chem Theory Comput* **8**, 1542-1555 (2012).
- 1123 5. R. Salomon-Ferrer, A. W. Götz, D. Poole, S. Le Grand, R. C. Walker, Routine Microsecond  
1124 Molecular Dynamics Simulations with AMBER on GPUs. 2. Explicit Solvent Particle Mesh Ewald.  
1125 *J Chem Theory Comput* **9**, 3878-3888 (2013).
- 1126 6. J. A. Maier *et al.*, ff14SB: Improving the Accuracy of Protein Side Chain and Backbone  
1127 Parameters from ff99SB. *J Chem Theory Comput* **11**, 3696-3713 (2015).
- 1128 7. D. Kozakov, K. H. Clodfelter, S. Vajda, C. J. Camacho, Optimal clustering for detecting near-  
1129 native conformations in protein docking. *Biophys J* **89**, 867-875 (2005).
- 1130 8. D. Rajamani, S. Thiel, S. Vajda, C. J. Camacho, Anchor residues in protein-protein interactions.  
1131 *Proc Natl Acad Sci U S A* **101**, 11287-11292 (2004).
- 1132 9. D. R. Koes, C. J. Camacho, ZINCPharmer: pharmacophore search of the ZINC database. *Nucleic  
1133 Acids Res* **40**, W409-414 (2012).
- 1134 10. P. C. Hawkins, A. G. Skillman, G. L. Warren, B. A. Ellingson, M. T. Stahl, Conformer generation  
1135 with OMEGA: algorithm and validation using high quality structures from the Protein Databank  
1136 and Cambridge Structural Database. *J Chem Inf Model* **50**, 572-584 (2010).
- 1137 11. E. T. Dustrude *et al.*, Hierarchical CRMP2 posttranslational modifications control Nav1.7 function.  
1138 *Proc Natl Acad Sci U S A* **113**, E8443-E8452 (2016).
- 1139 12. K. Gomez *et al.*, Stereospecific Effects of Benzimidazolonepiperidine Compounds on T-Type  
1140 Ca(2+) Channels and Pain. *ACS Chem Neurosci* 10.1021/acchemneuro.2c00256 (2022).
- 1141 13. S. S. Bellampalli *et al.*, Betulinic acid, derived from the desert lavender *Hyptis emoryi*, attenuates  
1142 paclitaxel-, HIV-, and nerve injury-associated peripheral sensory neuropathy via block of N- and  
1143 T-type calcium channels. *Pain* **160**, 117-135 (2019).
- 1144 14. A. Moutal *et al.*, Homology-guided mutational analysis reveals the functional requirements for  
1145 antinociceptive specificity of collapsin response mediator protein 2-derived peptides. *Br J  
1146 Pharmacol* **175**, 2244-2260 (2018).
- 1147 15. A. Moutal *et al.*, Dissecting the role of the CRMP2-neurofibromin complex on pain behaviors. *Pain  
1148* **158**, 2203-2221 (2017).
- 1149 16. A. Moutal *et al.*, Studies on CRMP2 SUMOylation-deficient transgenic mice identify sex-specific  
1150 Nav1.7 regulation in the pathogenesis of chronic neuropathic pain. *Pain* **161**, 2629-2651 (2020).
- 1151 17. Z. P. Feng *et al.*, Residue Gly1326 of the N-type calcium channel alpha 1B subunit controls  
1152 reversibility of omega-conotoxin GVIA and MVIIA block. *J Biol Chem* **276**, 15728-15735 (2001).
- 1153 18. R. Newcomb *et al.*, Selective peptide antagonist of the class E calcium channel from the venom  
1154 of the tarantula *Hysterocrates gigas*. *Biochemistry* **37**, 15353-15362 (1998).
- 1155 19. I. M. Mintz *et al.*, P-type calcium channels blocked by the spider toxin omega-Aga-IVA. *Nature  
1156* **355**, 827-829 (1992).
- 1157 20. W. Choe *et al.*, TTA-P2 is a potent and selective blocker of T-type calcium channels in rat  
1158 sensory neurons and a novel antinociceptive agent. *Mol Pharmacol* **80**, 900-910 (2011).
- 1159 21. Y. Dou *et al.*, Orai1 Plays a Crucial Role in Central Sensitization by Modulating Neuronal  
1160 Excitability. *J Neurosci* **38**, 887-900 (2018).
- 1161 22. D. Bagdas, S. D. AlSharari, K. Freitas, M. Tracy, M. I. Damaj, The role of alpha5 nicotinic  
1162 acetylcholine receptors in mouse models of chronic inflammatory and neuropathic pain. *Biochem  
1163 Pharmacol* **97**, 590-600 (2015).
- 1164 23. Y. Imamura, H. Kawamoto, O. Nakanishi, Characterization of heat-hyperalgesia in an  
1165 experimental trigeminal neuropathy in rats. *Exp Brain Res* **116**, 97-103 (1997).
- 1166 24. T. L. Yaksh, T. A. Rudy, Chronic catheterization of the spinal subarachnoid space. *Physiol Behav  
1167* **17**, 1031-1036 (1976).
- 1168 25. S. R. Chaplan, F. W. Bach, J. W. Pogrel, J. M. Chung, T. L. Yaksh, Quantitative assessment of  
1169 tactile allodynia in the rat paw. *J Neurosci Methods* **53**, 55-63 (1994).

1170 26. C. Y. Liu *et al.*, The role of large-conductance, calcium-activated potassium channels in a rat  
1171 model of trigeminal neuropathic pain. *Cephalalgia* **35**, 16-35 (2015).  
1172 27. A. Narula, J. S. McCormick, Spontaneous duodenocolic fistula. *J R Coll Surg Edinb* **35**, 253-254  
1173 (1990).  
1174 28. R. A. Bevins, J. Besheer, Object recognition in rats and mice: a one-trial non-matching-to-sample  
1175 learning task to study 'recognition memory'. *Nat Protoc* **1**, 1306-1311 (2006).  
1176 29. M. I. Ferdousi *et al.*, Characterization of pain-, anxiety-, and cognition-related behaviors in the  
1177 complete Freund's adjuvant model of chronic inflammatory pain in Wistar-Kyoto rats. *Front Pain*  
1178 *Res (Lausanne)* **4**, 1131069 (2023).  
1179 30. R. Benoliel, A. Wilensky, M. Tal, E. Eliav, Application of a pro-inflammatory agent to the orbital  
1180 portion of the rat infraorbital nerve induces changes indicative of ongoing trigeminal pain. *Pain* **99**,  
1181 567-578 (2002).  
1182 31. B. P. Vos, A. M. Strassman, R. J. Maciewicz, Behavioral evidence of trigeminal neuropathic pain  
1183 following chronic constriction injury to the rat's infraorbital nerve. *J Neurosci* **14**, 2708-2723  
1184 (1994).  
1185 32. M. Gupta, H. J. Lee, C. J. Barden, D. F. Weaver, The Blood-Brain Barrier (BBB) Score. *J Med*  
1186 *Chem* **62**, 9824-9836 (2019).  
1187 33. C. A. Lipinski, Lead- and drug-like compounds: the rule-of-five revolution. *Drug Discov Today*  
1188 *Technol* **1**, 337-341 (2004).  
1189 34. G. R. Bickerton, G. V. Paolini, J. Besnard, S. Muresan, A. L. Hopkins, Quantifying the chemical  
1190 beauty of drugs. *Nat Chem* **4**, 90-98 (2012).  
1191
